# Supplementary material for: DNA Origami “Quick” Refolding inside of a Micron-Sized Compartment
Source: PubMed Central journal article supplement (PMC6983259; doi:10.3390/molecules25010008), 2019-12-18
Supplement: molecules-25-00008-s001.pdf [file molecules-25-00008-s001.pdf]

## Supplementary materials

**DNA origami "Quick" refolding inside of a micron-sized compartment**

Taiki Watanabe<sup>1</sup>, Yusuke Sato<sup>1,2</sup>, Hayato Otaka<sup>1</sup>, Ibuki Kawamata<sup>1</sup>, Satoshi Murata<sup>1</sup> and Shin-ichiro M. NOMURA<sup>1,\*</sup>

<sup>1</sup> Department of Robotics, Graduate School of Engineering, Tohoku University, Sendai 980-8579, Japan

<sup>2</sup> Department of Computer Science, Tokyo Institute of Technology, Kanagawa 226-8502, Japan

\* Correspondence: nomura@molbot.mech.tohoku.ac.jp; Tel.: +81-22-795-6910 (S.-i.M.N.)

**Contents:**

**Figure S1:** Electrophoresis data for the DNA origami.

**Figure S2:** Analysing the size distribution of the droplets.

**Figure S3:** Fluorescence microscopic images of the droplets, including DNA mixtures stained with SYBRGold.

**Figure S4:** Designs of the DNA origamis used in this study.

**Figure S5.** AFM images of the Truss-origami from the opened droplets.

**Figure S6.** AFM image set of the purified conventional DNA origami structures (before re-annealing).

**Figure S7.** AFM image set of the conventional DNA origami structures in bulk solution with a "Normal\_45min" annealing profile.

**Figure S8.** AFM image set of the conventional DNA origami structures in "medium"-sized droplet with a normal "Normal\_45min" annealing profile.

**Figure S9.** AFM image set of the conventional DNA origami structures in bulk solution under "Quick\_1min" annealing conditions.

**Figure S10.** AFM image set of the conventional DNA origami structures in "medium"-sized droplets under "Quick\_1min" annealing conditions.

**Figure S11.** AFM image set of the purified DNA truss structures (before re-annealing).

**Figure S12.** AFM image set of the DNA truss structures in bulk solution with a "Normal\_45min" annealing profile.

**Figure S13.** AFM image set of the DNA truss structures in "medium"-sized droplet with a "Normal\_45min" annealing profile.

**Figure S14.** AFM image set of the DNA truss structures in bulk solution under "Quick\_1min" annealing conditions.

34 **Figure S15.** AFM image set of the DNA truss structures in “small”-sized droplets under  
35 “Quick\_1min” annealing conditions.

36 **Figure S16.** AFM image set of the DNA truss structures in “medium”-sized droplets under  
37 “Quick\_1min” annealing conditions.

38 **Figure S17.** AFM image set of the DNA truss structures in “large”-sized droplets under  
39 “Quick\_1min” annealing conditions.

40 **Figure S18.** Distributions of the melting temperature of the staple DNA set.

41 **Table S1:** DNA sequences of the staples used for the truss DNA origami.

42 **Table S2:** DNA sequences of the staples used for the conventional DNA origami.

43 **Figure S19.** The “folding” efficiencies of DNA origami from a mixture of a 1:1 ratio of the scaffold to  
44 staple (1 nM).

45

46

47

48

49

50

51

52

53

54

55

56

57

58

59

60

61

62

63

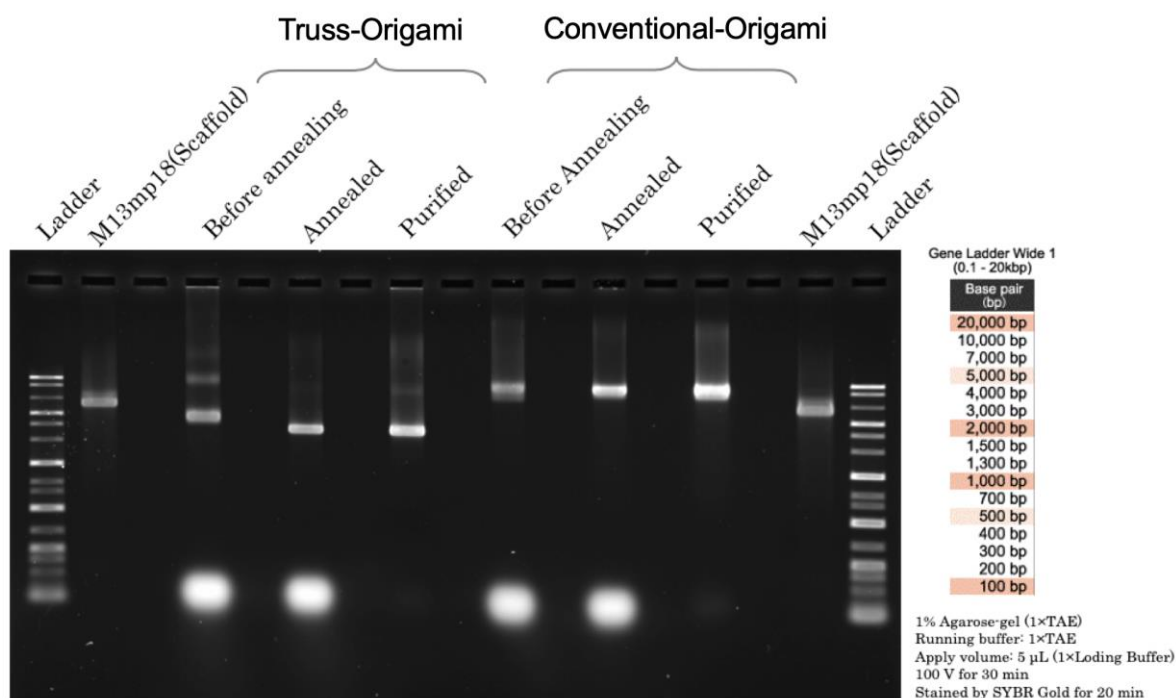

64

65 **Figure S1.** Electrophoresis data for the DNA origamis before and after folding as well as after  
 66 purification. The concentration of the eliminated non-bounded staples, through purification, was  
 67 estimated by digital analysis of the band intensity of the electrophoresis image using ImageJ  
 68 software. We concluded that at least 92% of the non-bounded staples are eliminated (Truss-Origami:  
 69 8.0%, Conventional-Origami: 7.2%).

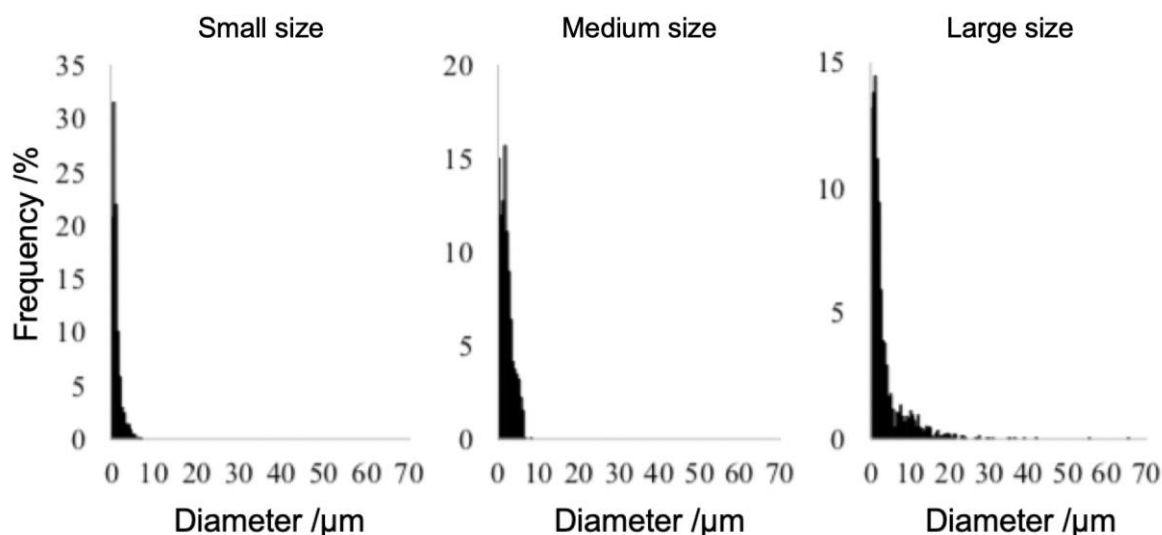

70

71 **Figure S2.** Size distribution of the droplets used in Fig. 3 shown in a wider range. The hydrophilic  
 72 fluorescent dye, 0.1 mM calcein (Dojindo, Tokyo, Japan), in TAE-Mg buffer was encapsulated inside  
 73 of droplets using the conditions described in the main text (section 4.3). Cross-sectional fluorescent  
 74 images of the droplets were obtained using a confocal microscope FV-1000 (Olympus, Tokyo,  
 75 Japan). The particle size distribution of the droplets was measured in the obtained images using  
 76 ImageJ software.

77

78

79

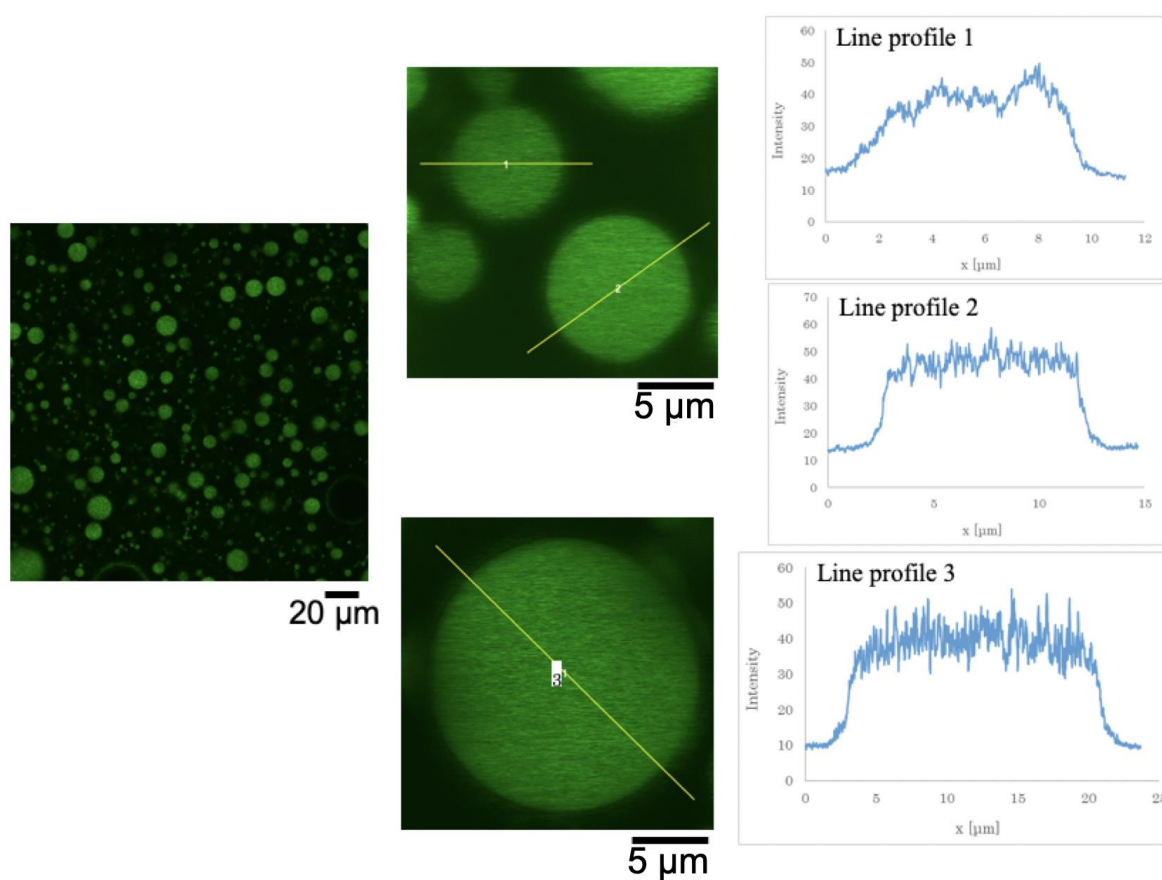

80

81 **Figure S3.** Fluorescence microscopic images and the line-profiles of the droplets, including scaffold DNA  
82 (M13mp18, stained by SYBRGold). The images were obtained using confocal microscopy (FV-1000,  
83 OLYMPUS, Tokyo, Japan). Laser: Wavelength 473 nm, intensity 7%, PMT Voltage: 500 V. Large droplets  
84 were chosen based on to the resolution limits of fluorescent microscopy.

85

86

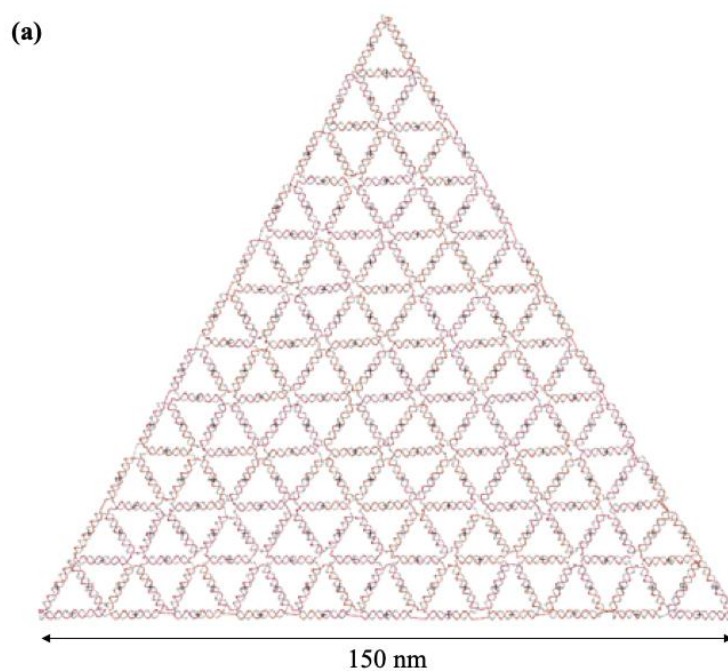

87

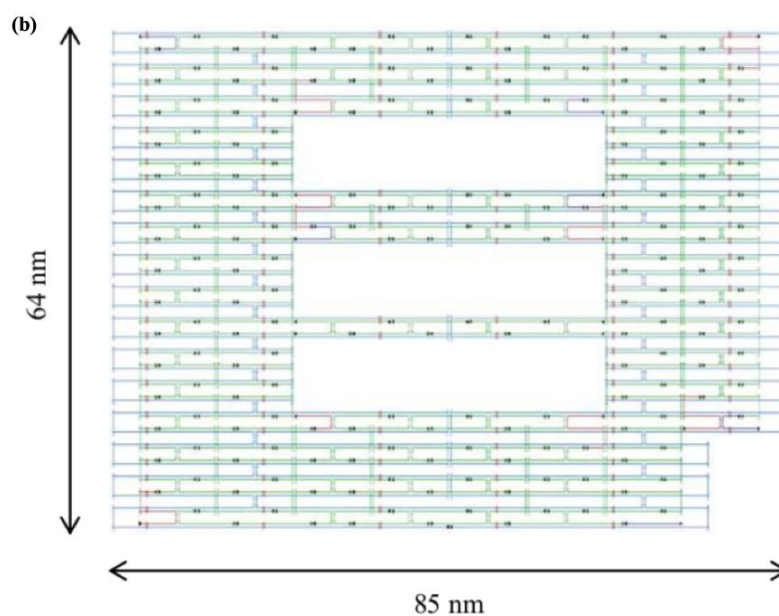

88

89 **Figure S4.** Designs of the DNA origamis used in this study. (a) Truss-DNA origami and (b)  
90 conventional DNA origami. The staple sequence data for the Truss and conventional DNA origami  
91 structures are shown in Tables S1 and S2, respectively.  
92

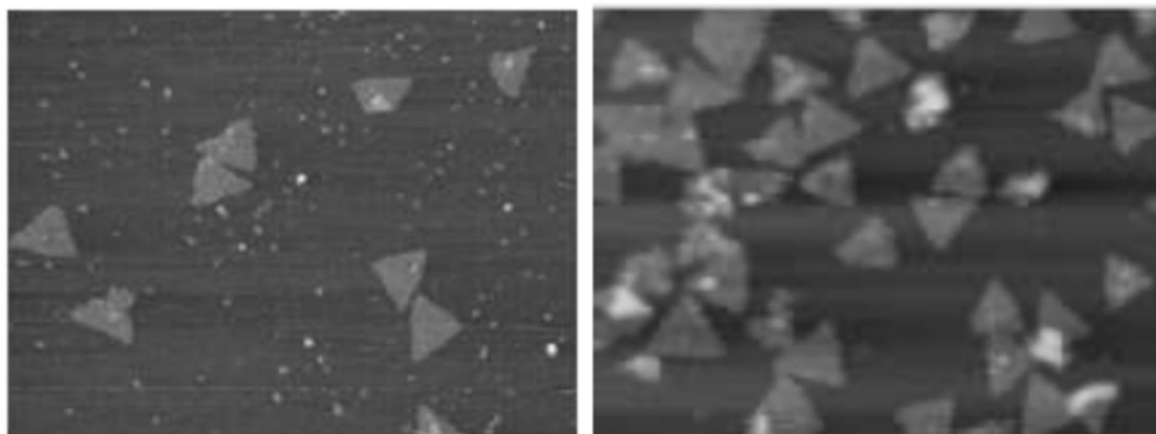

100 nm

93

94

95 **Figure S5.** AFM images of the Truss-origami from the opened droplets. Left: Before PEG  
96 purification. Right: After PEG purification. The debris appearing as small white dots in the left panel  
97 were eliminated after PEG purification.

98

99

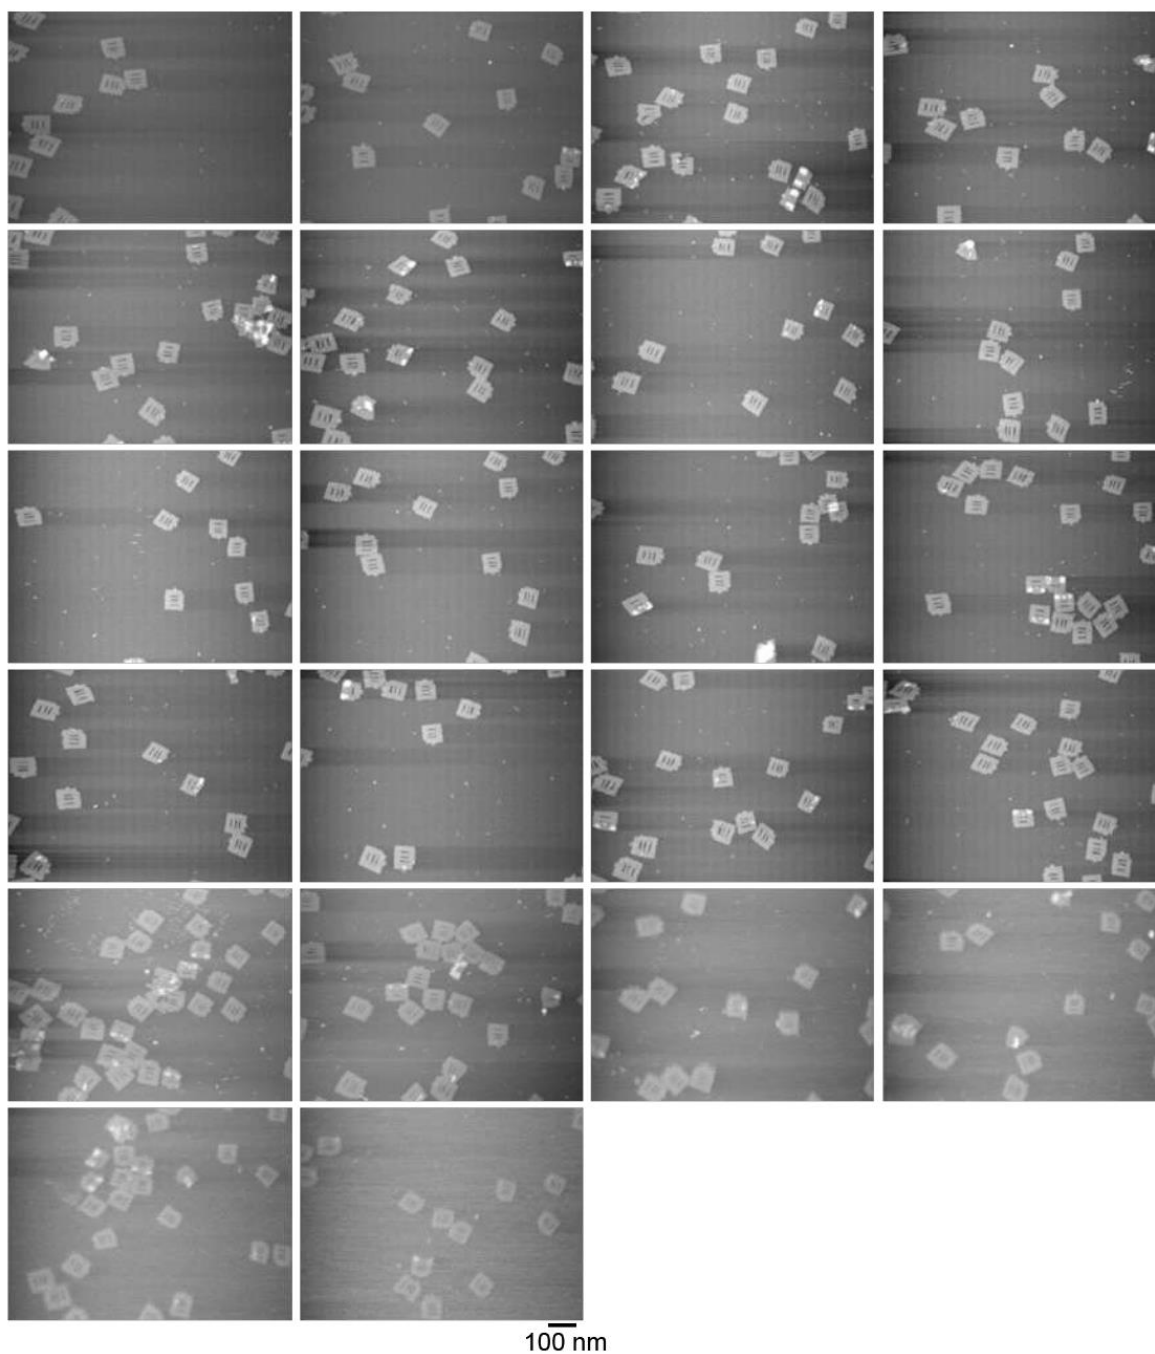

100

100 nm

101 **Figure S6.** AFM image set of the purified conventional DNA origami structures (before re-  
102 annealing).

103

104

105

106

107

108

109

110

111



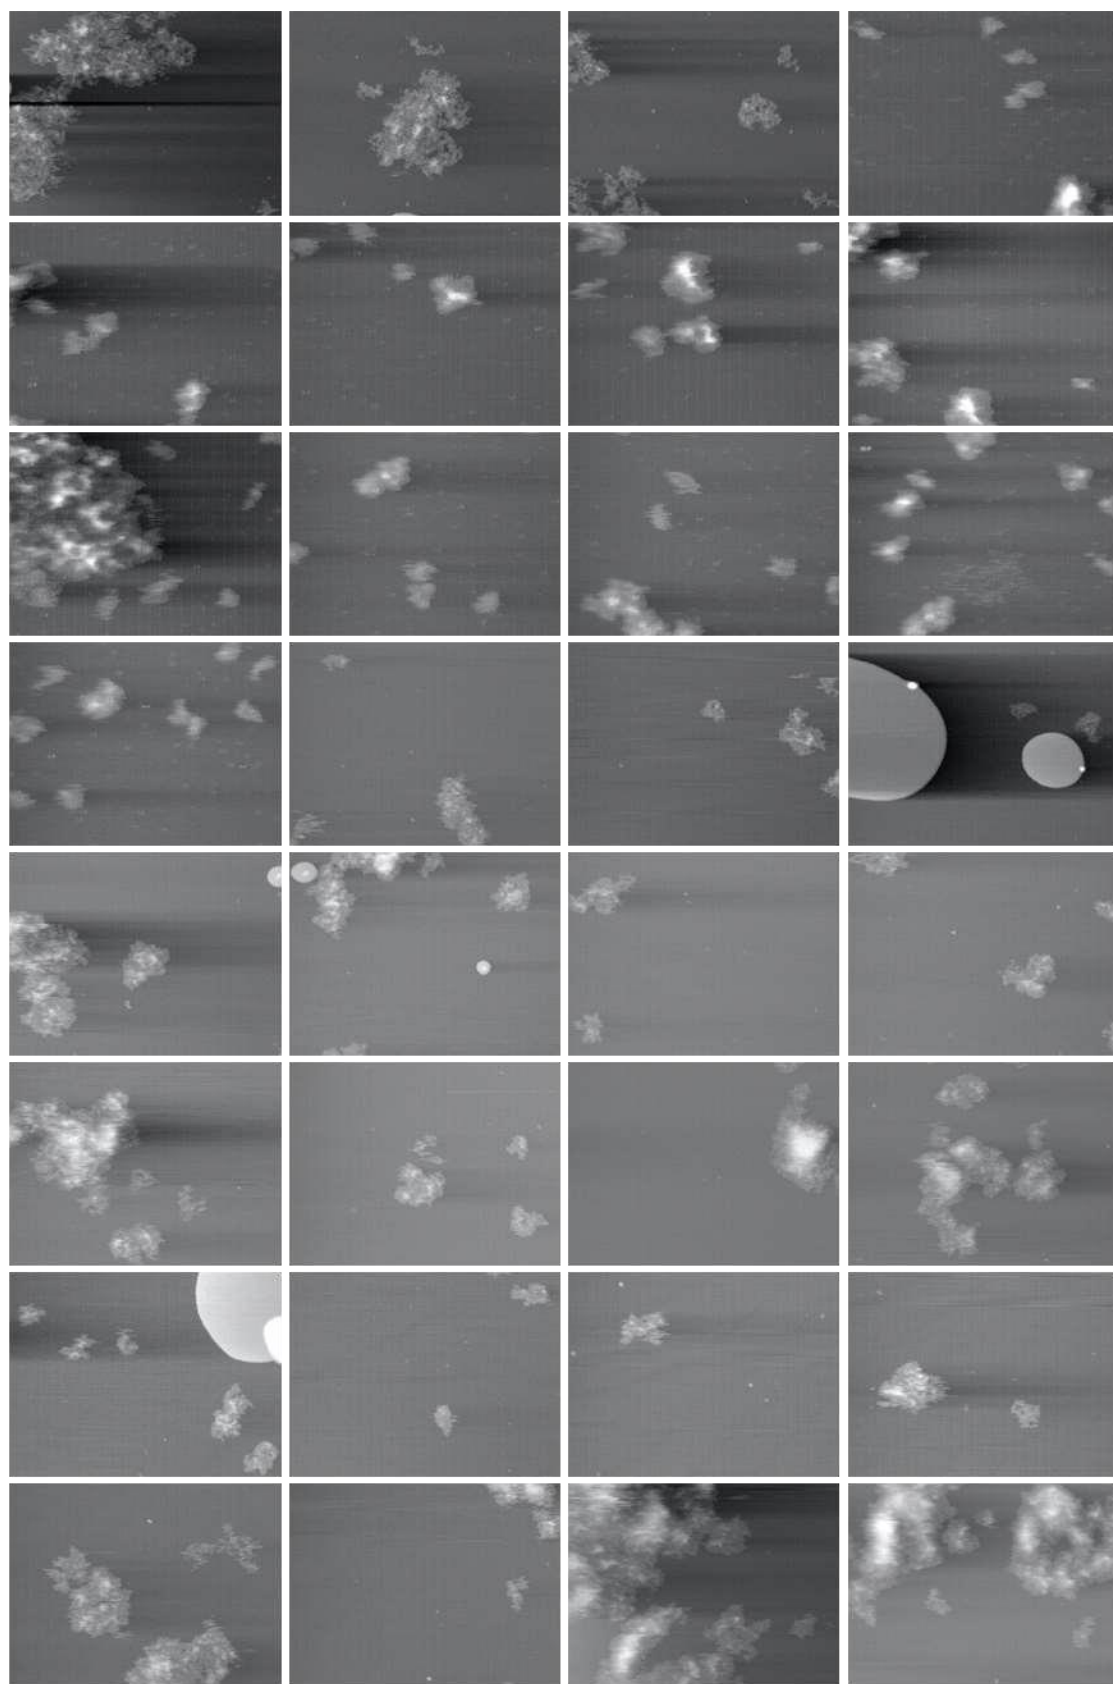

112  
113  
114

100 nm



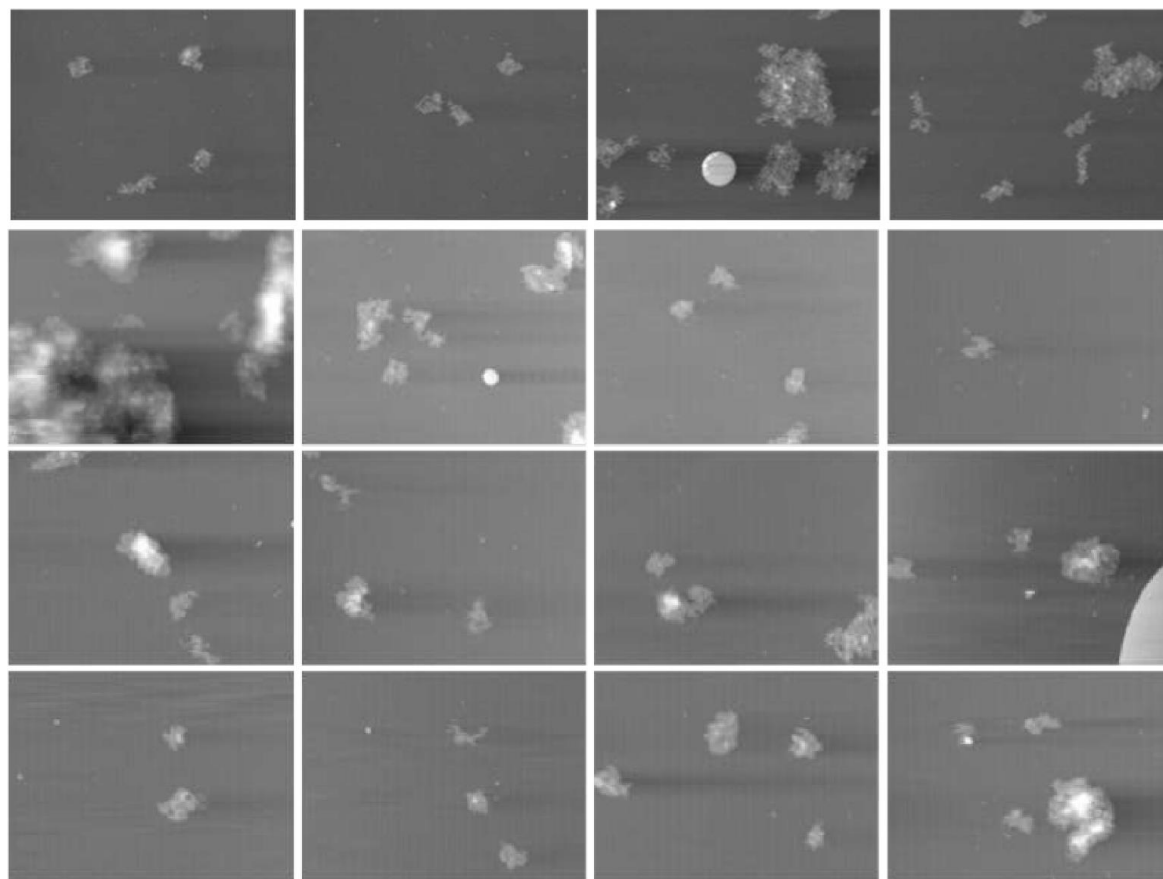

115

100 nm

116 **Figure S7.** AFM image set of the conventional DNA origami structures in bulk solution with a  
117 "Normal\_45min" annealing profile.

118

119

120

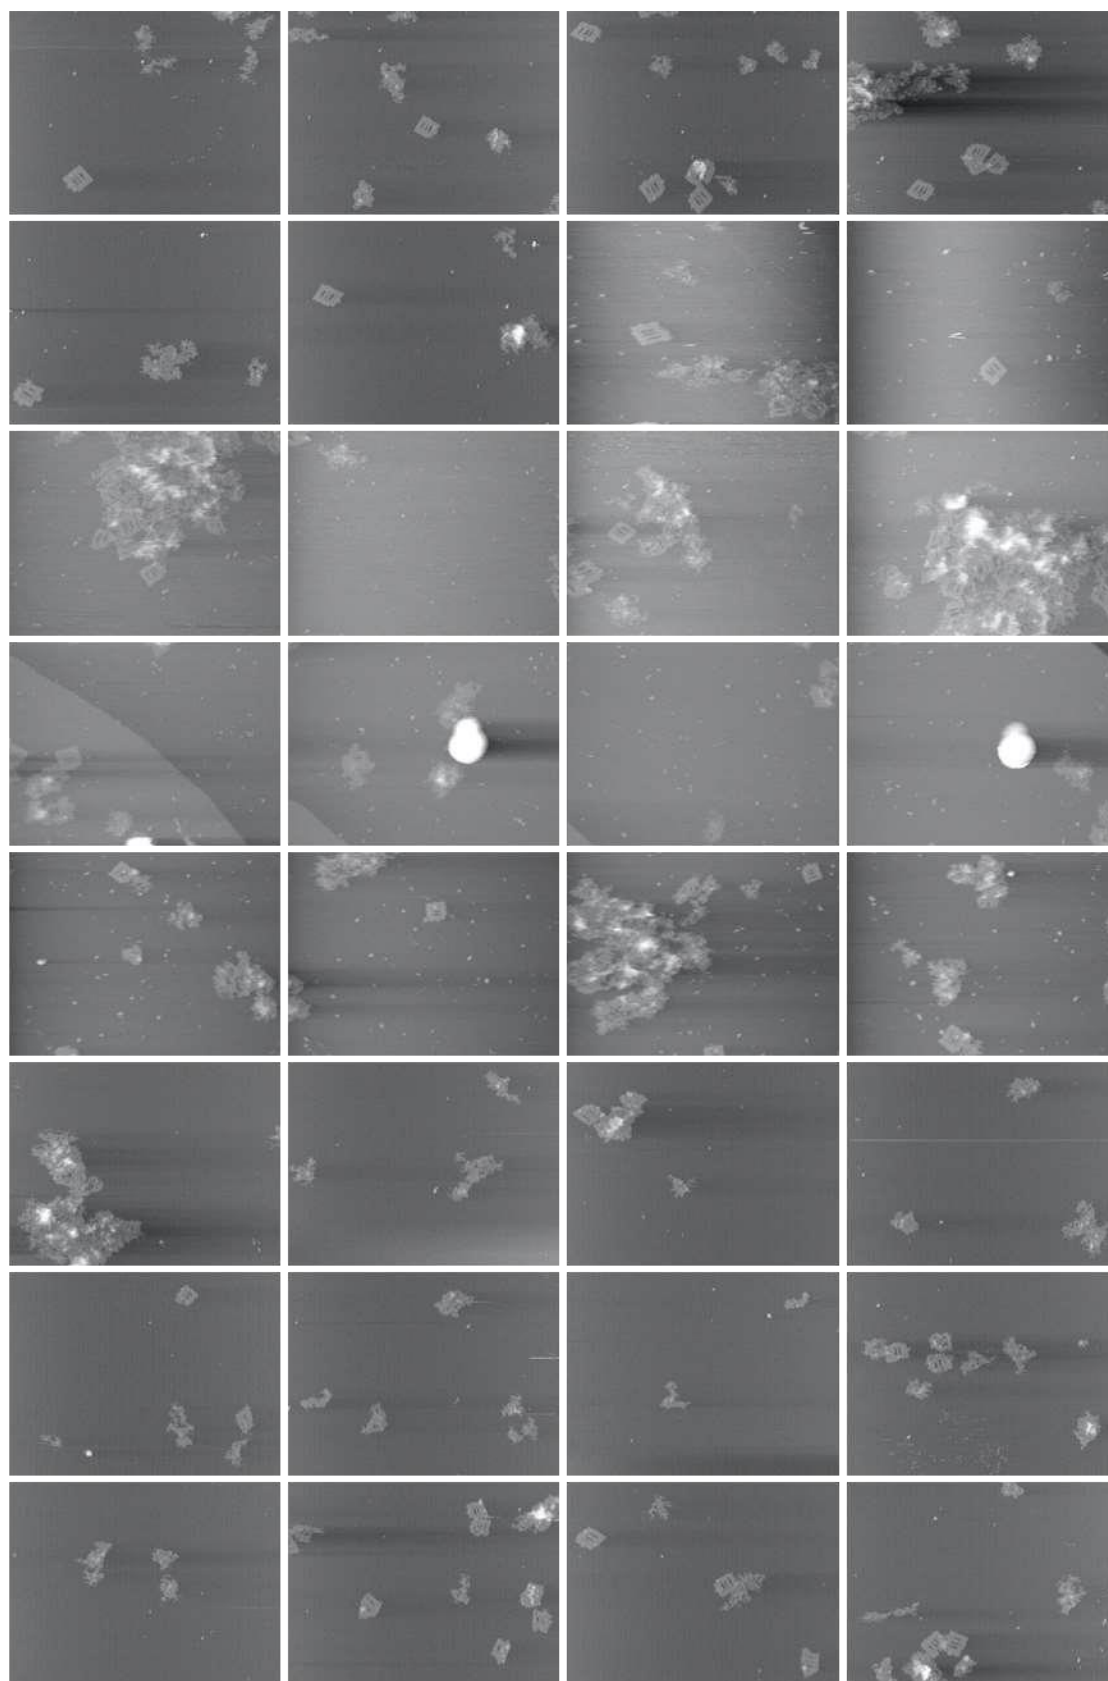

100 nm

121  
122  
123  
124

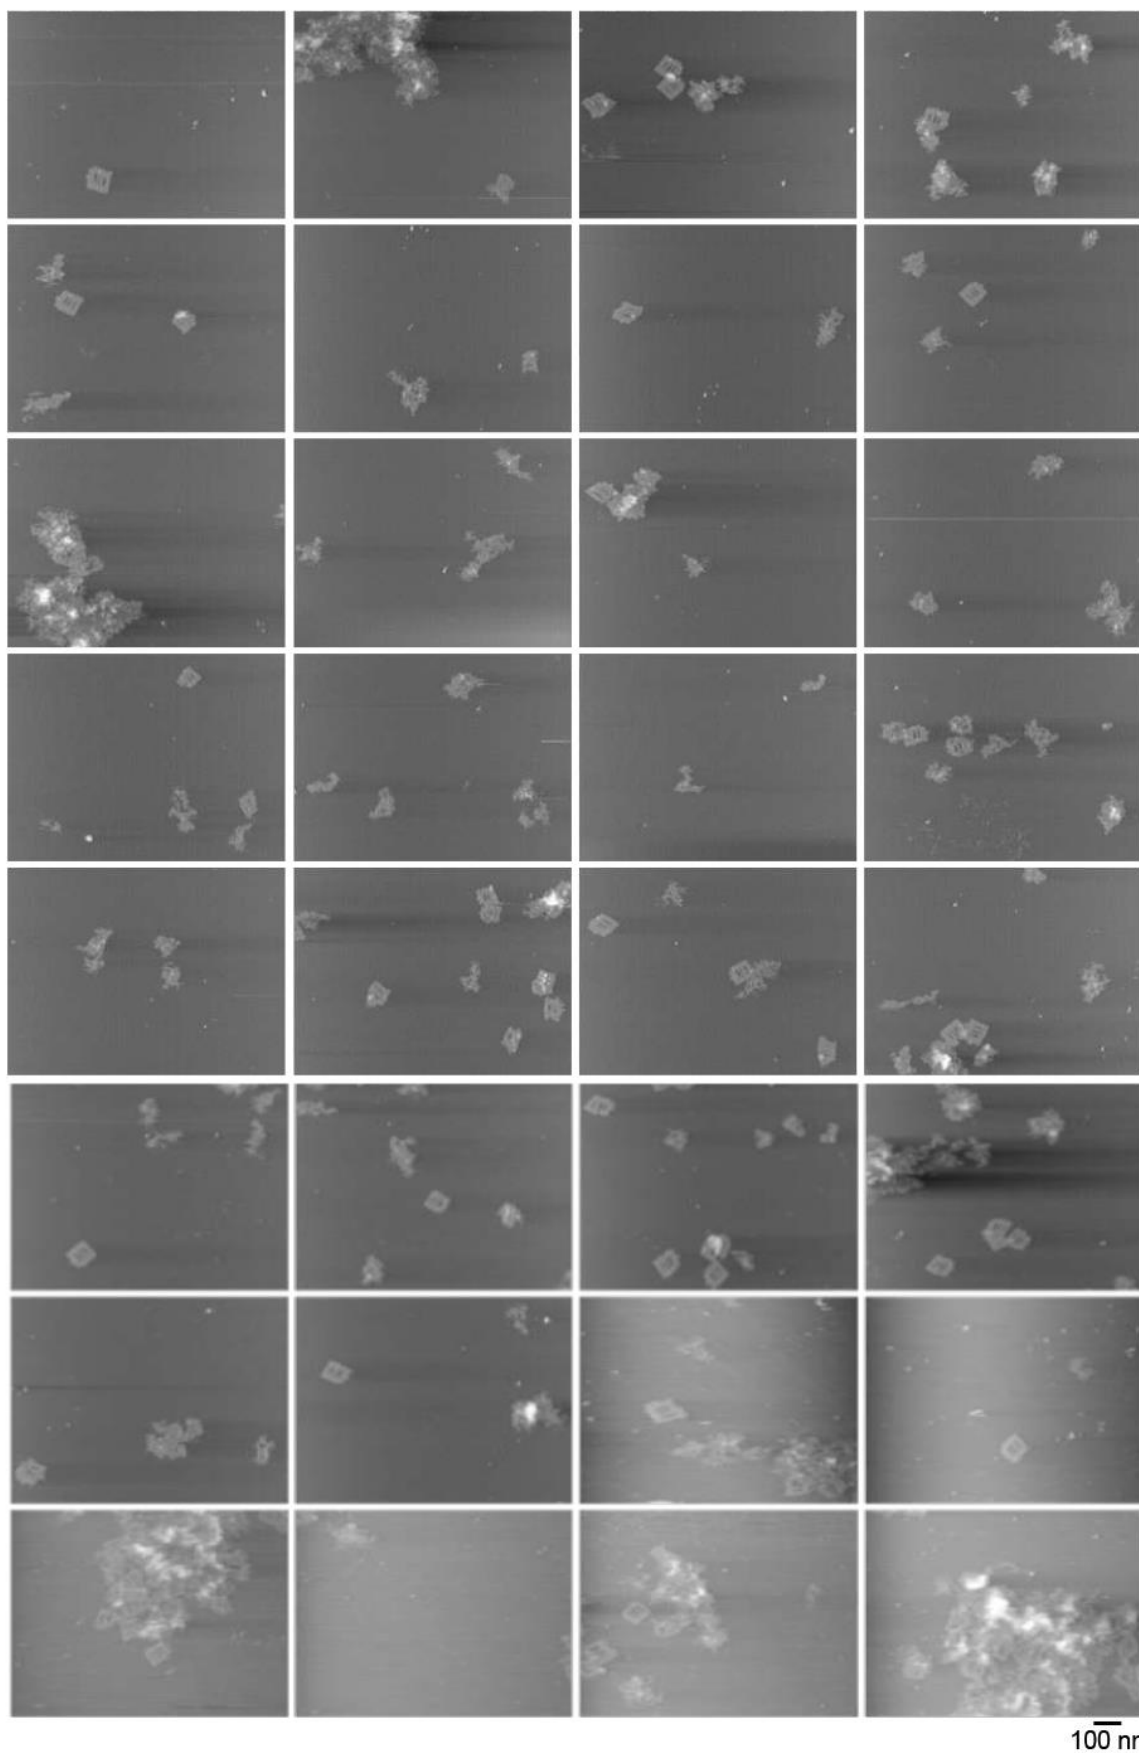

125

126  
127

**Figure S8.** AFM image set of the conventional DNA origami structures in “medium”-sized droplet with a normal “Normal\_45min” annealing profile.

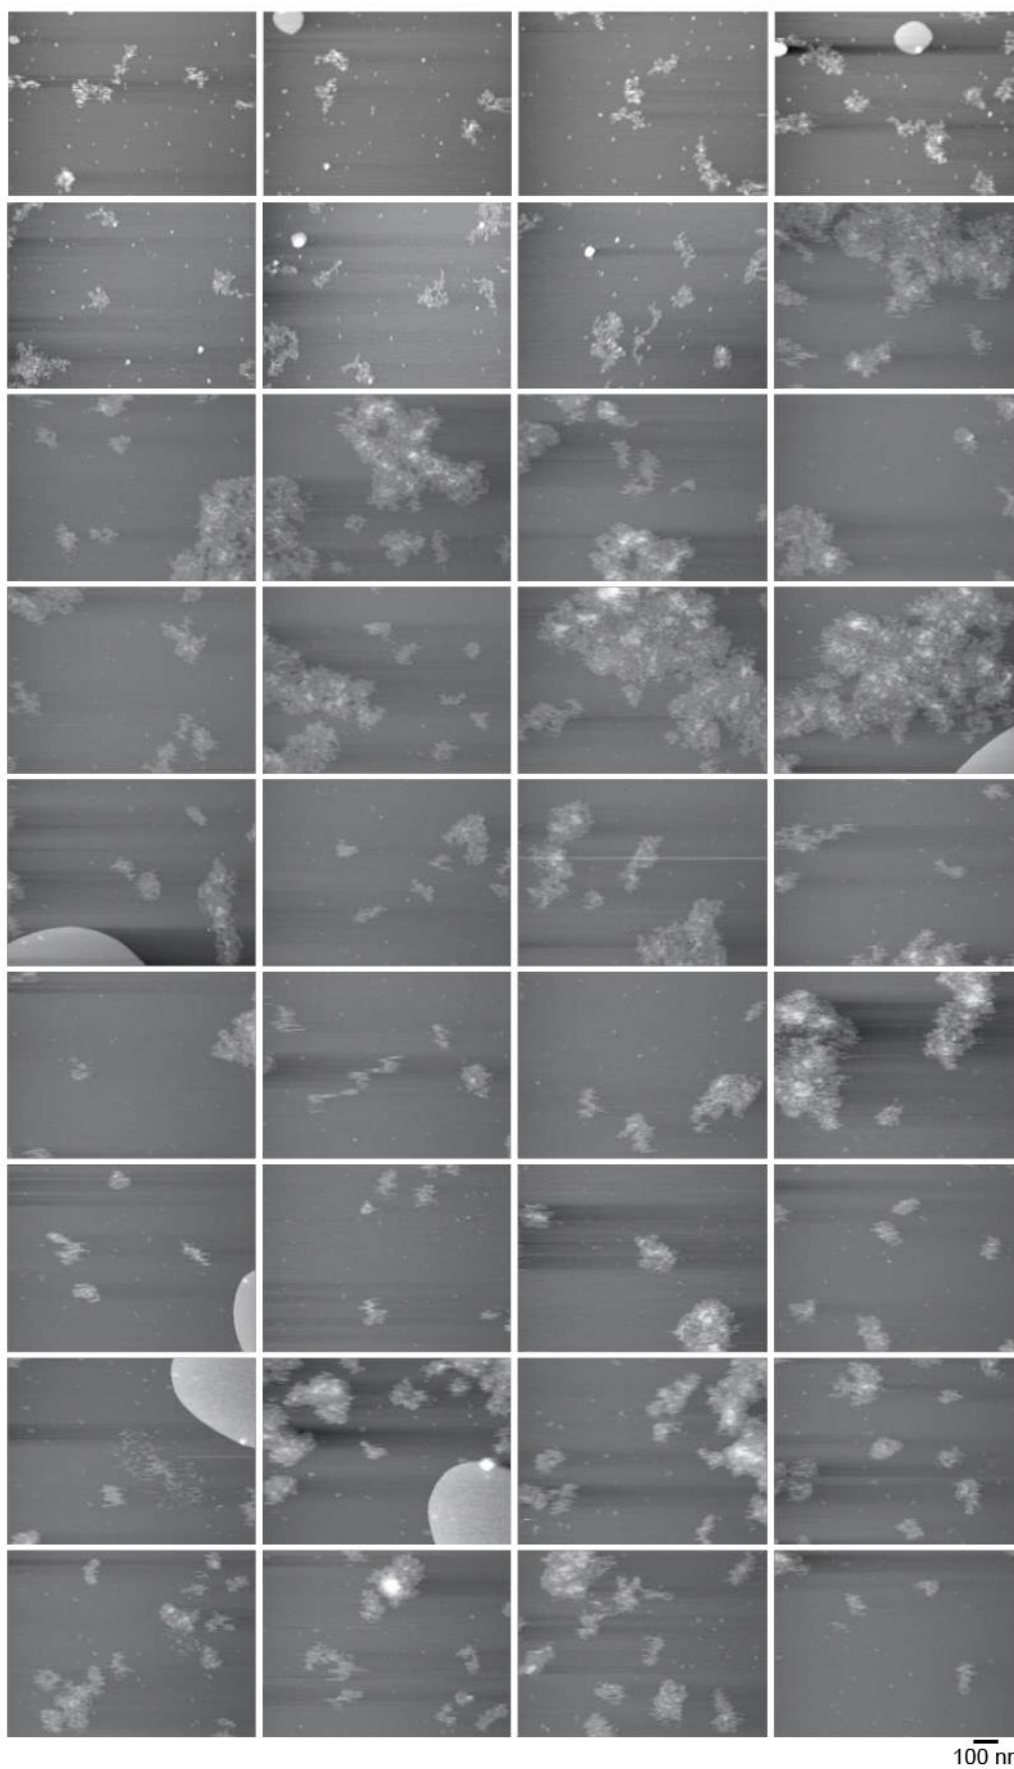

128

129  
130

**Figure S9.** AFM image set of the conventional DNA origami structures in bulk solution under "Quick\_1min" annealing conditions.

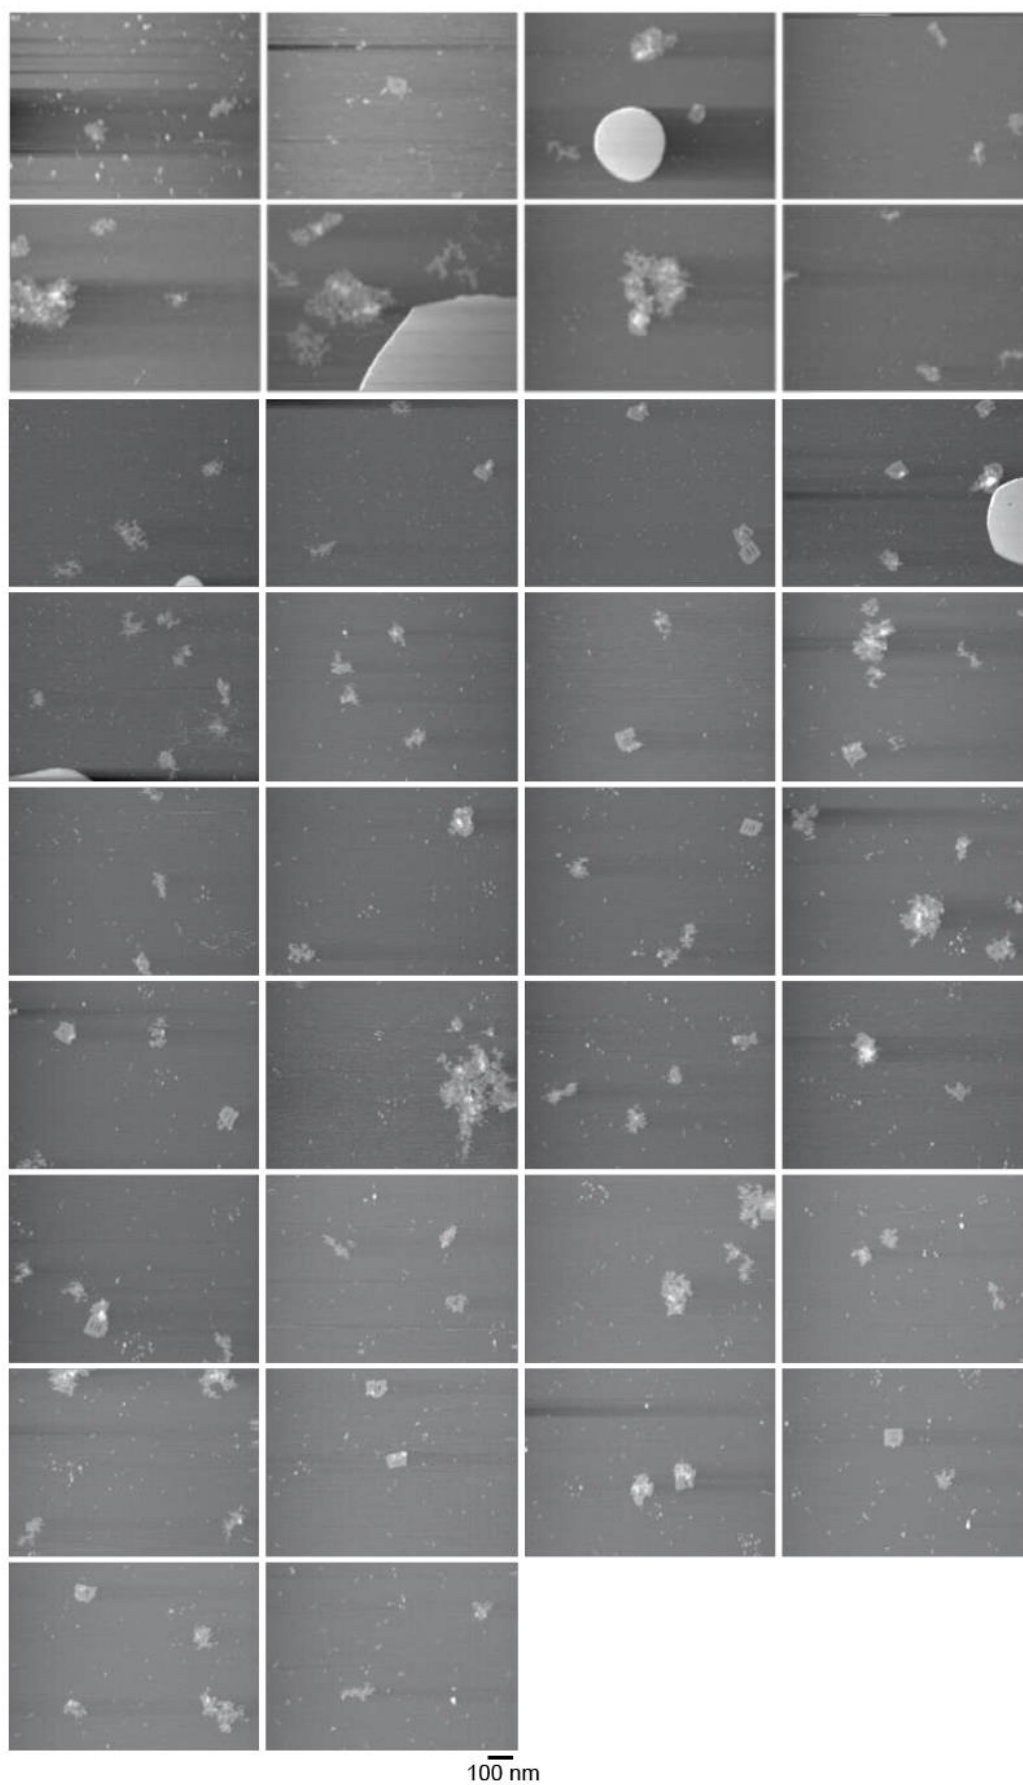

131

132  
133

**Figure S10.** AFM image set of the conventional DNA origami structures in “medium”-sized droplets under "Quick\_1min" annealing conditions.

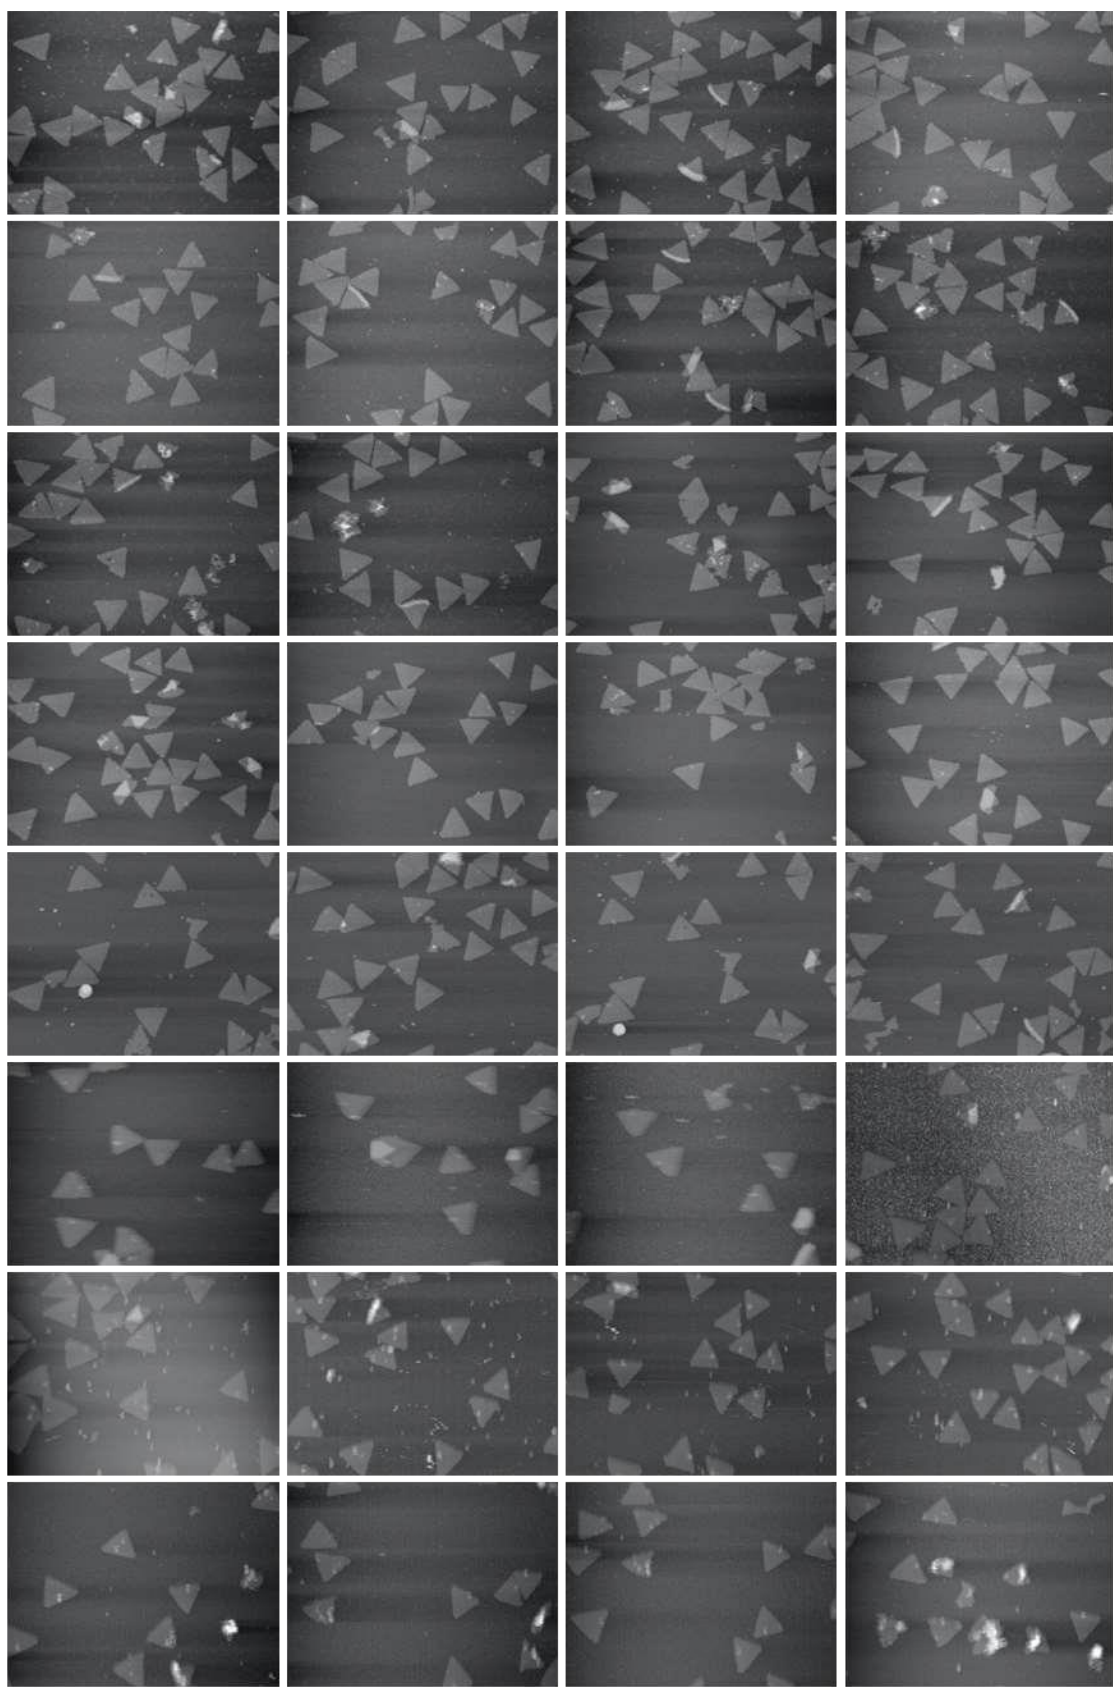

100 nm

134  
135



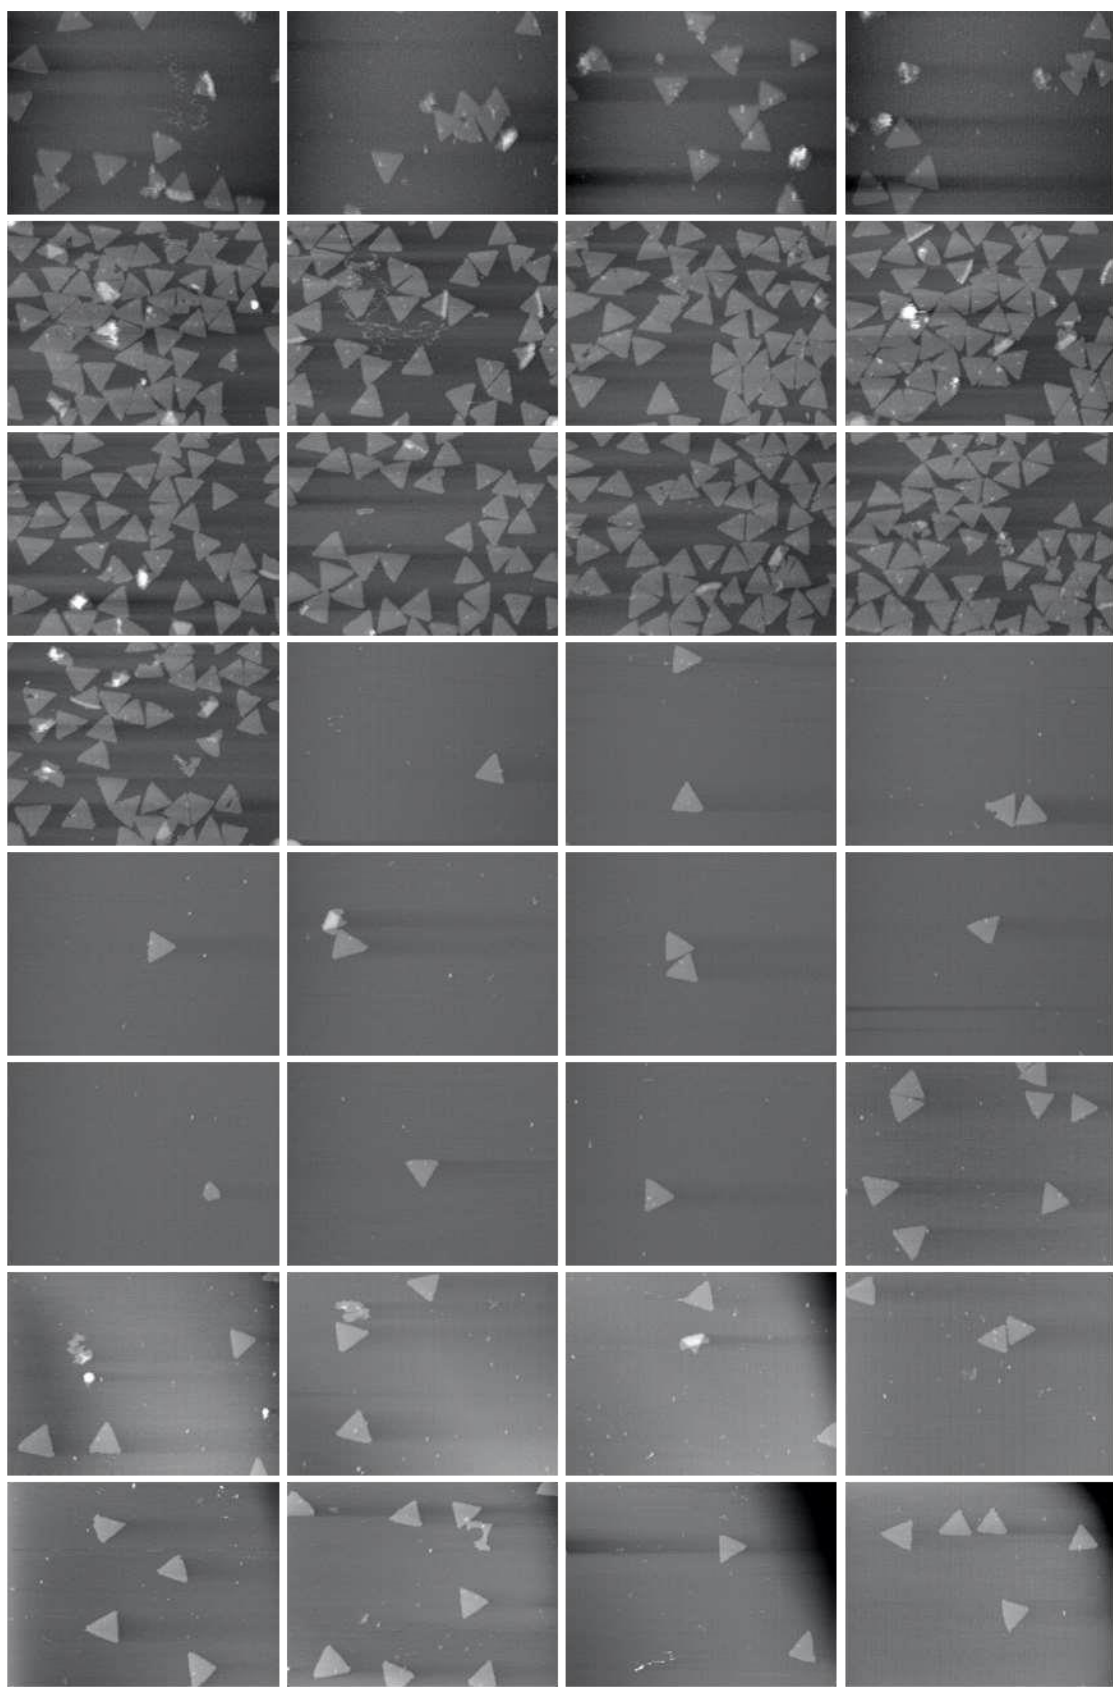

136

137



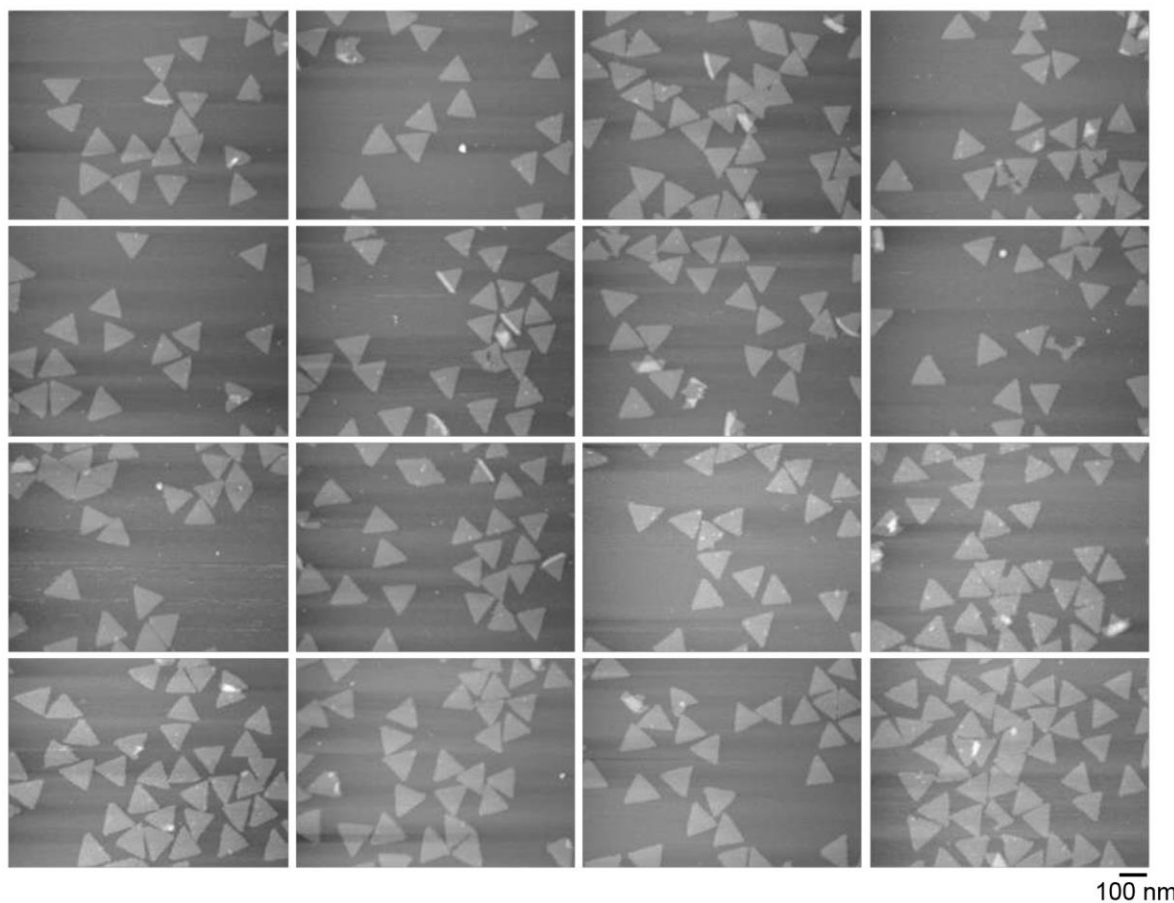

138

139

140

**Figure S11.** AFM image set of the purified DNA truss structures (before re-annealing).

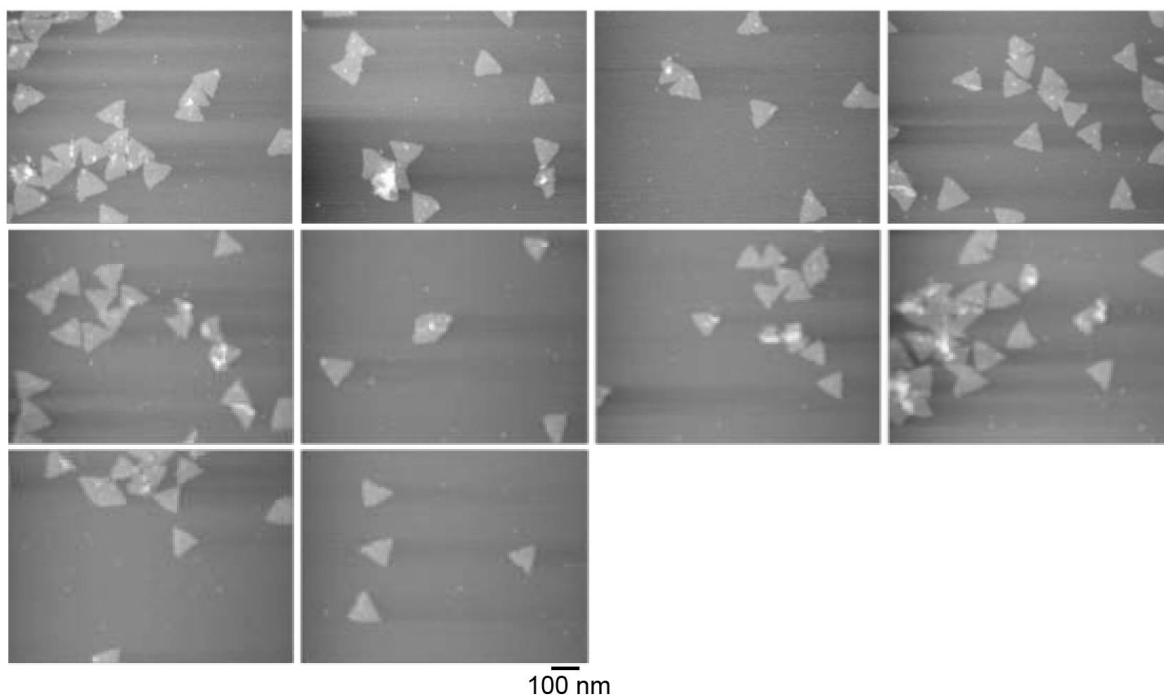

141

100 nm

142

**Figure S12.** AFM image set of the DNA truss structures in bulk solution with a "Normal\_45min" annealing profile.

143

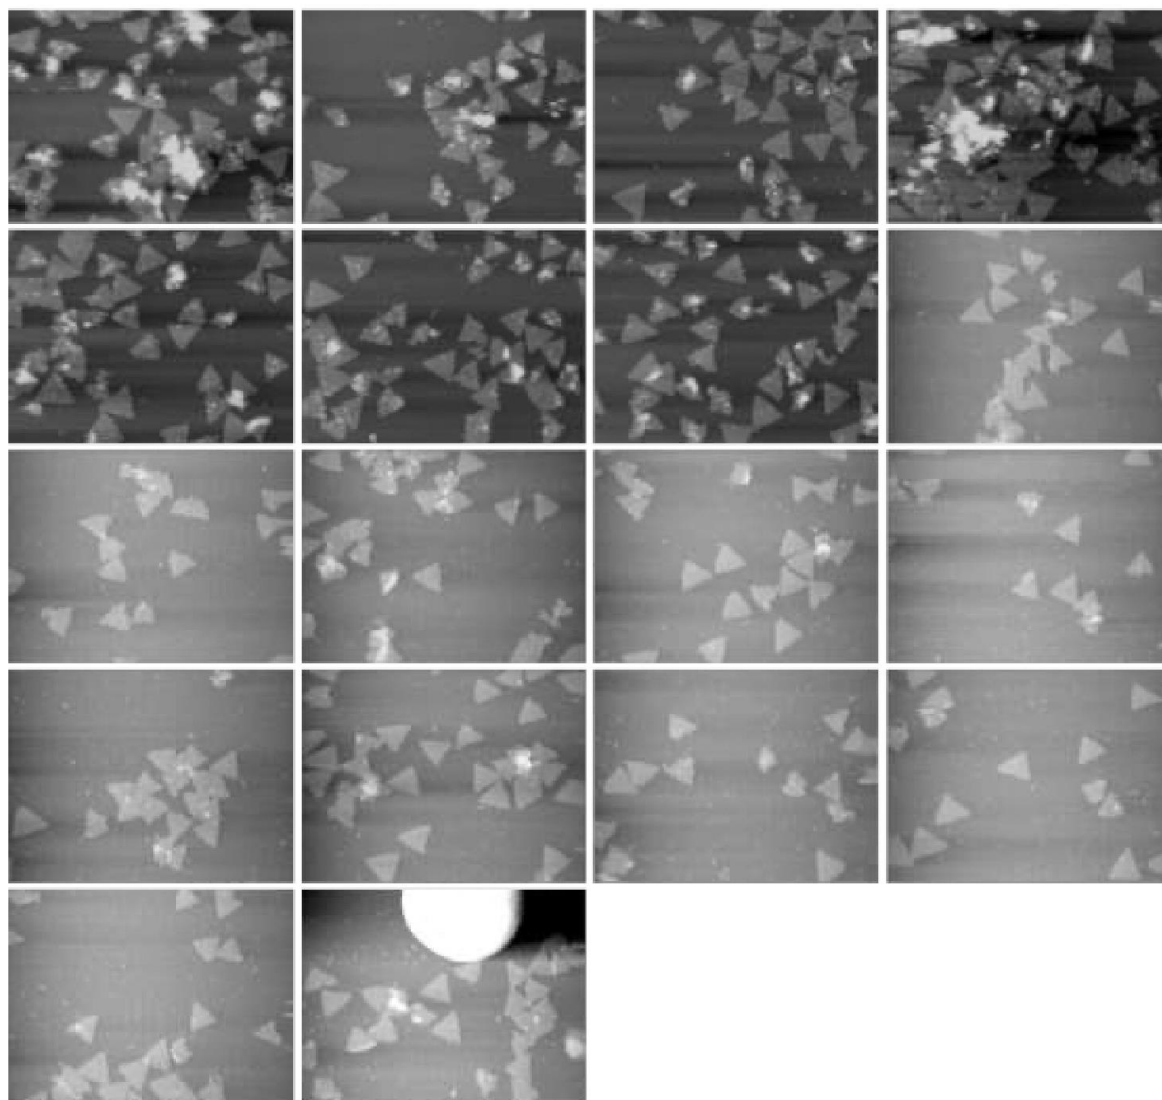

144

100 nm

145 **Figure S13.** AFM image set of the DNA truss structures in “medium”-sized droplet with a  
146 “Normal\_45min” annealing profile.

147

148

149

150

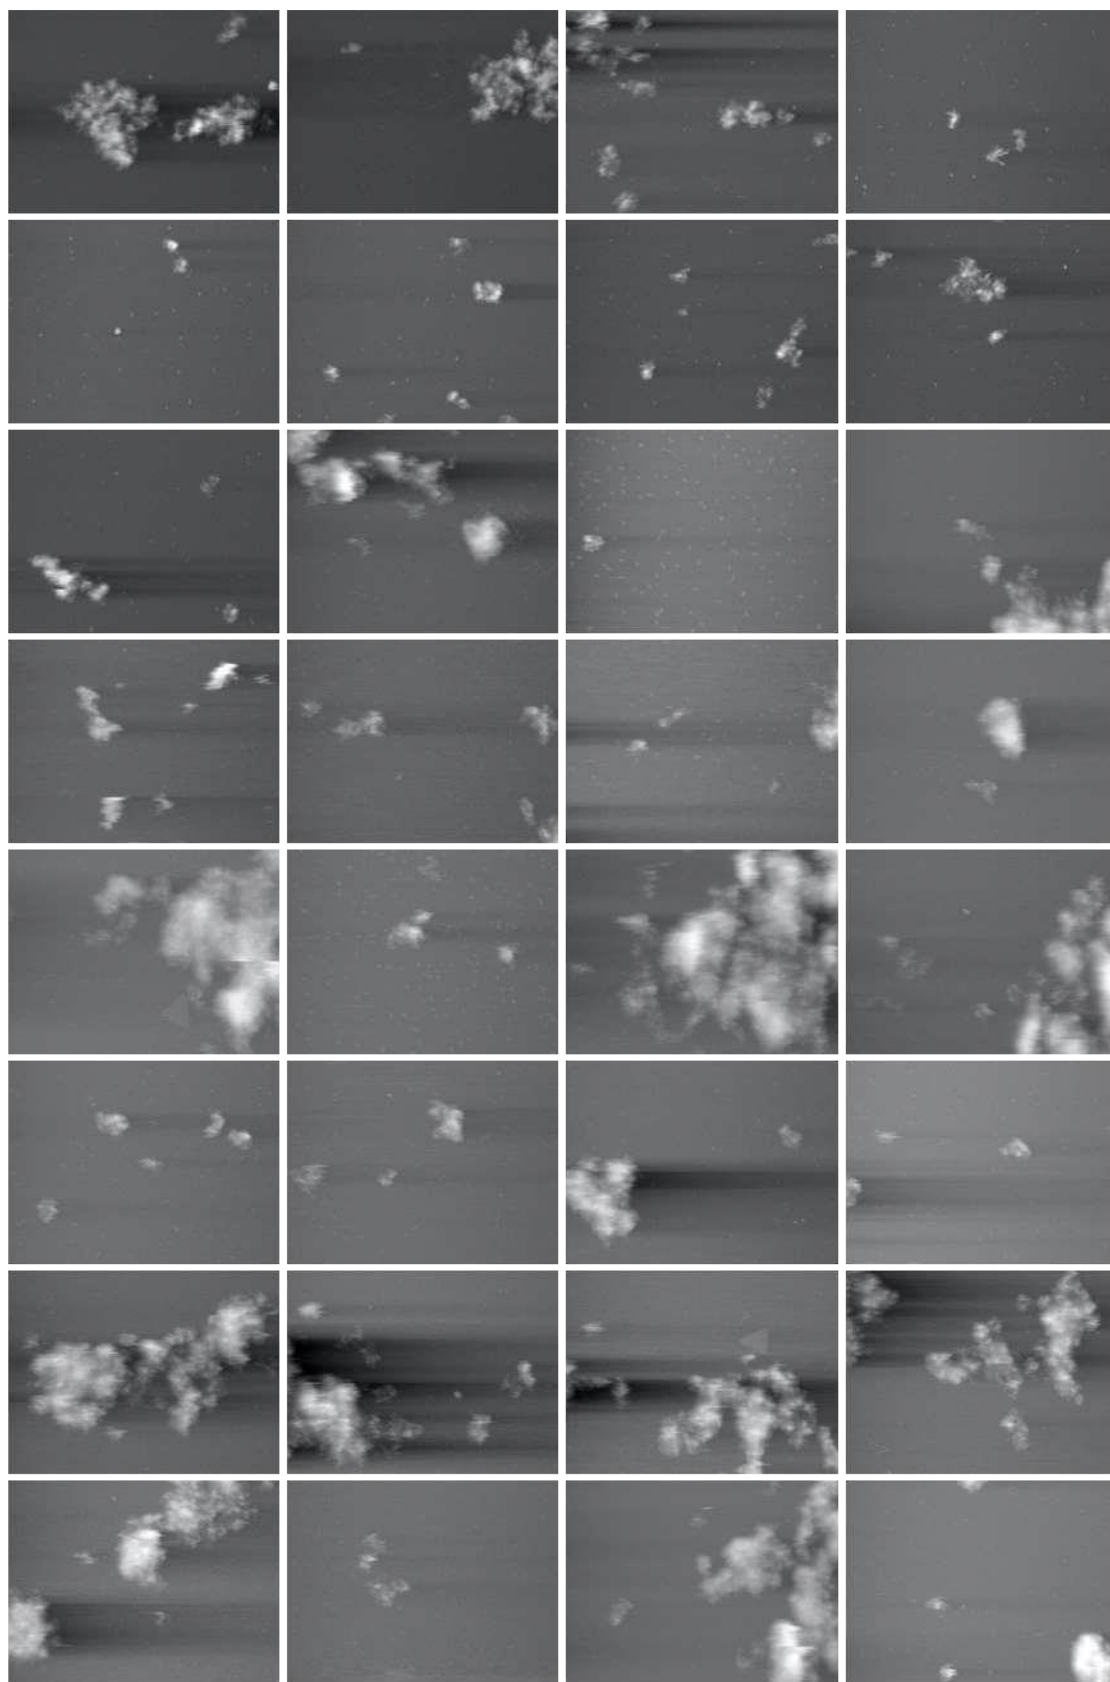

100 nm

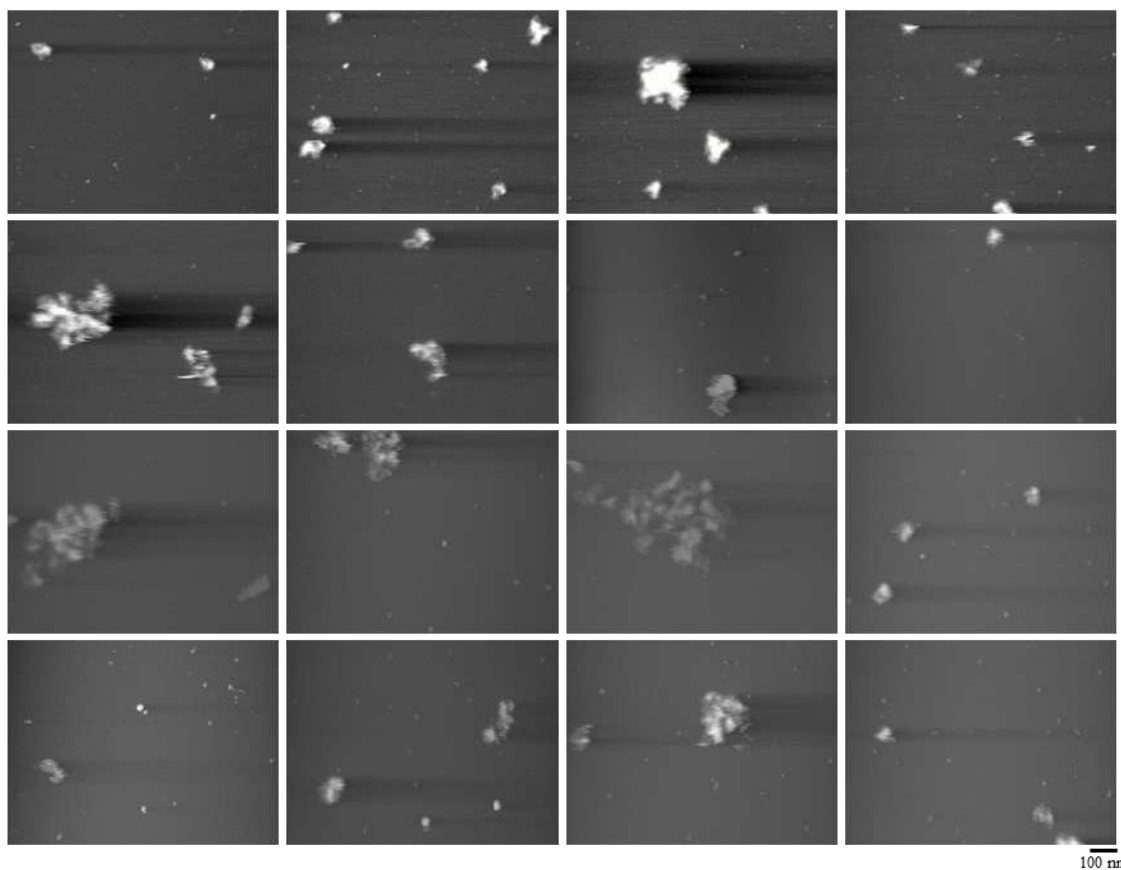

152

153  
154  
155

**Figure S14.** AFM image set of the DNA truss structures in bulk solution under "Quick\_1min" annealing conditions.

156

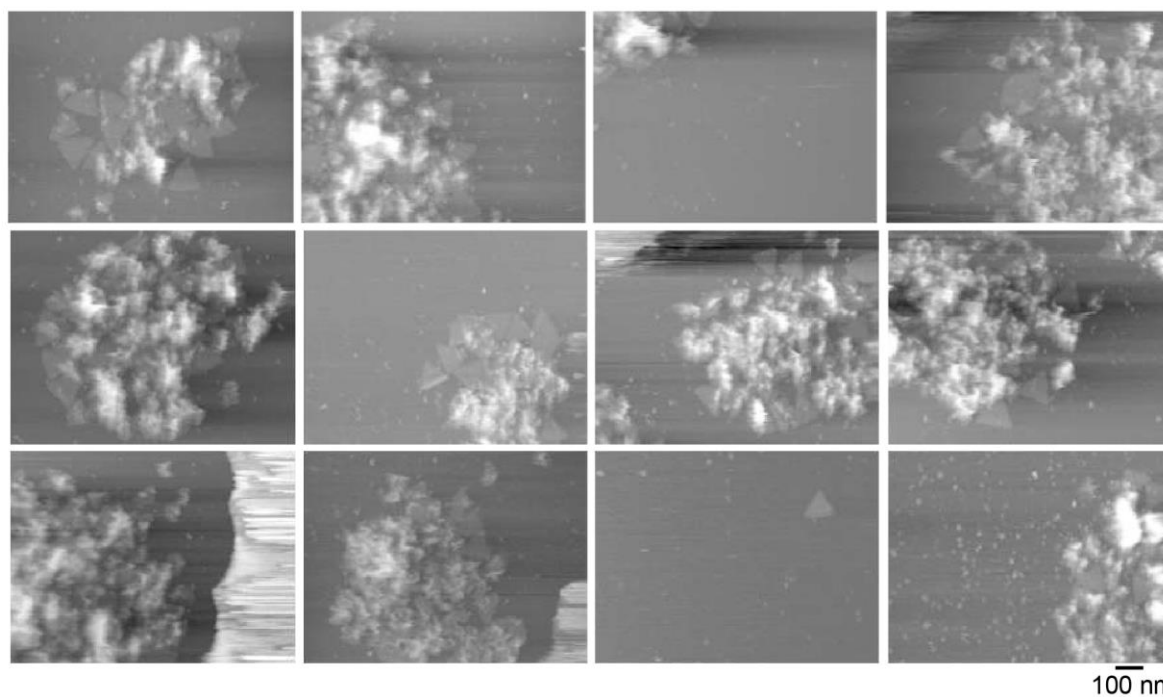

157

158

159

160

**Figure S15.** AFM image set of the DNA truss structures in “small”-sized droplets under “Quick\_1min” annealing conditions.

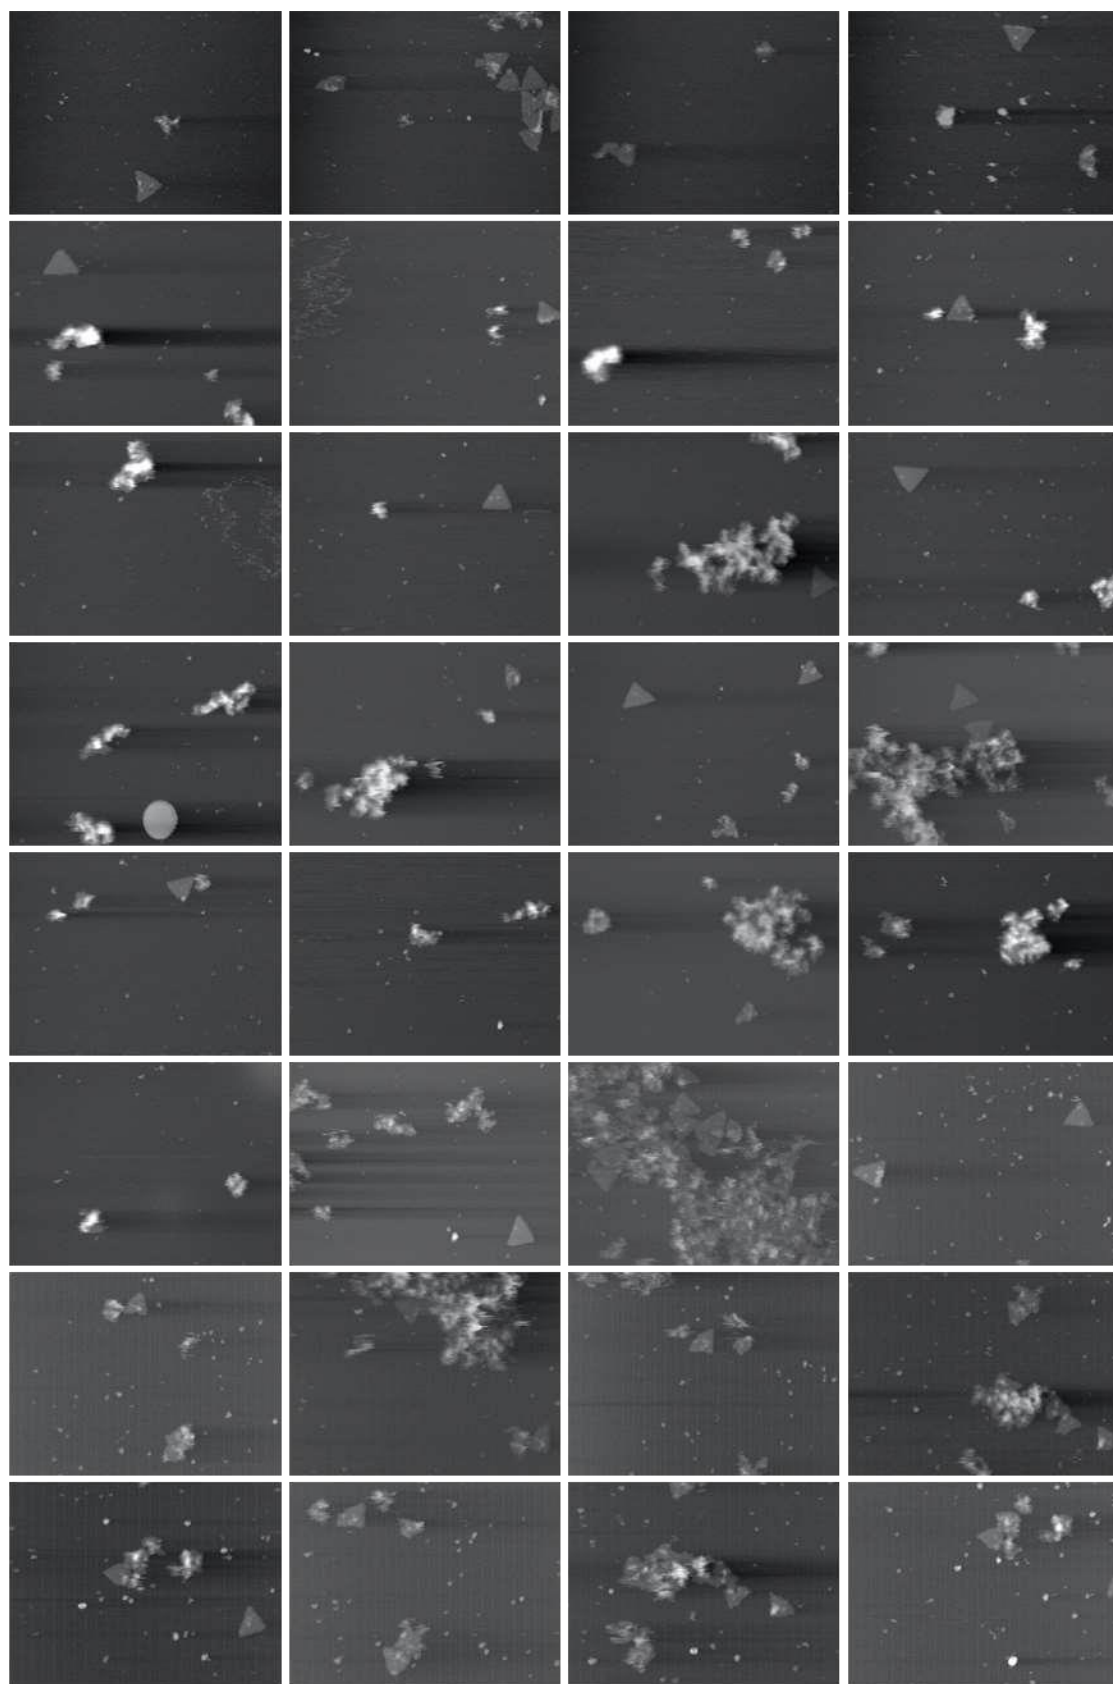

100 nm

161  
162  
163



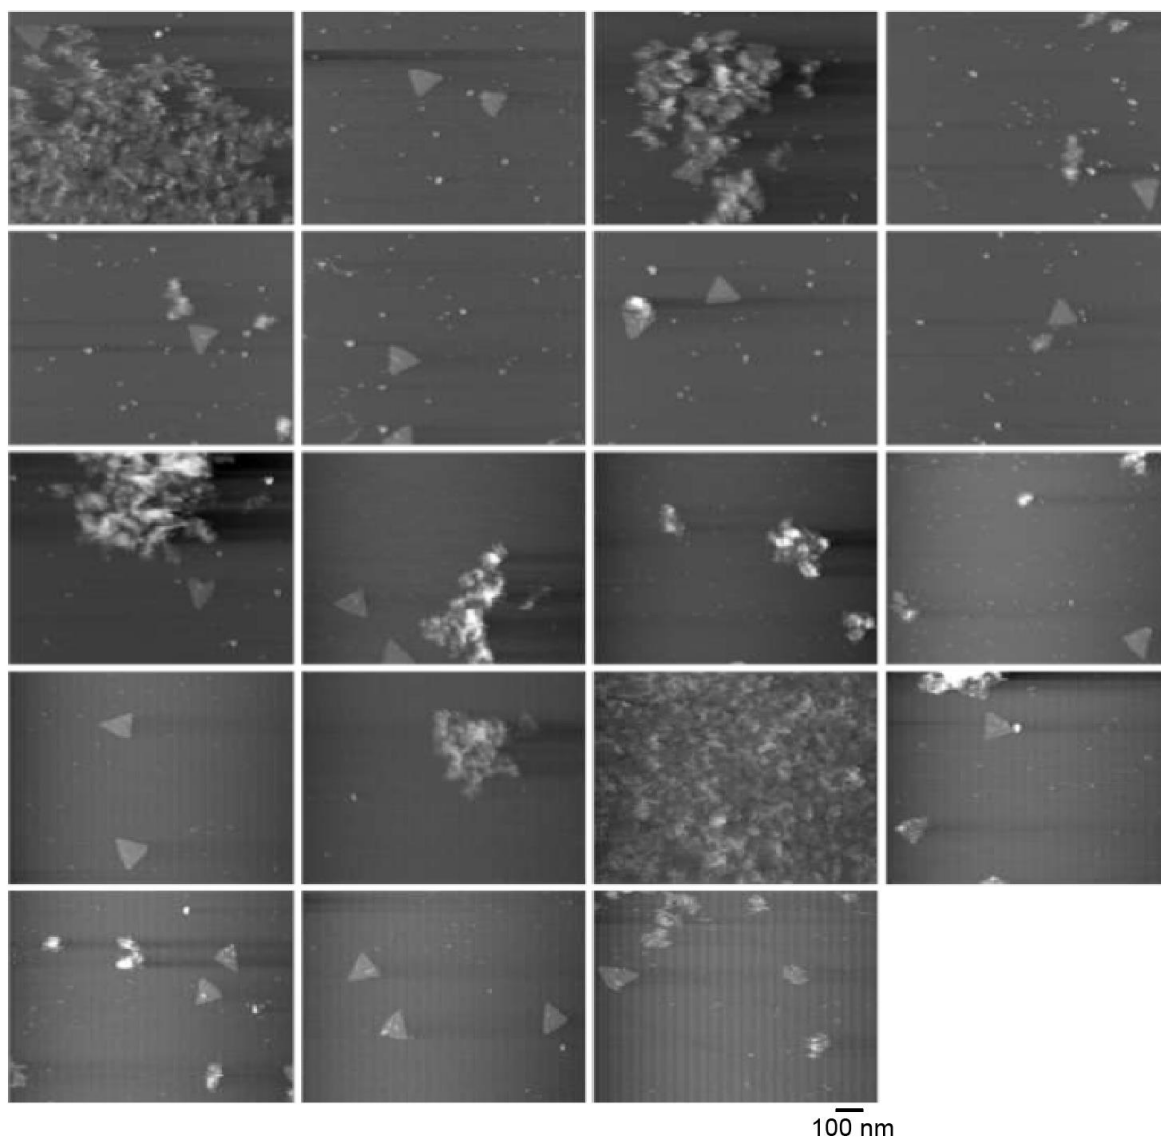

164

100 nm

165 **Figure S16.** AFM image set of the DNA truss structures in “medium”-sized droplets under  
166 “Quick\_1min” annealing conditions.

167

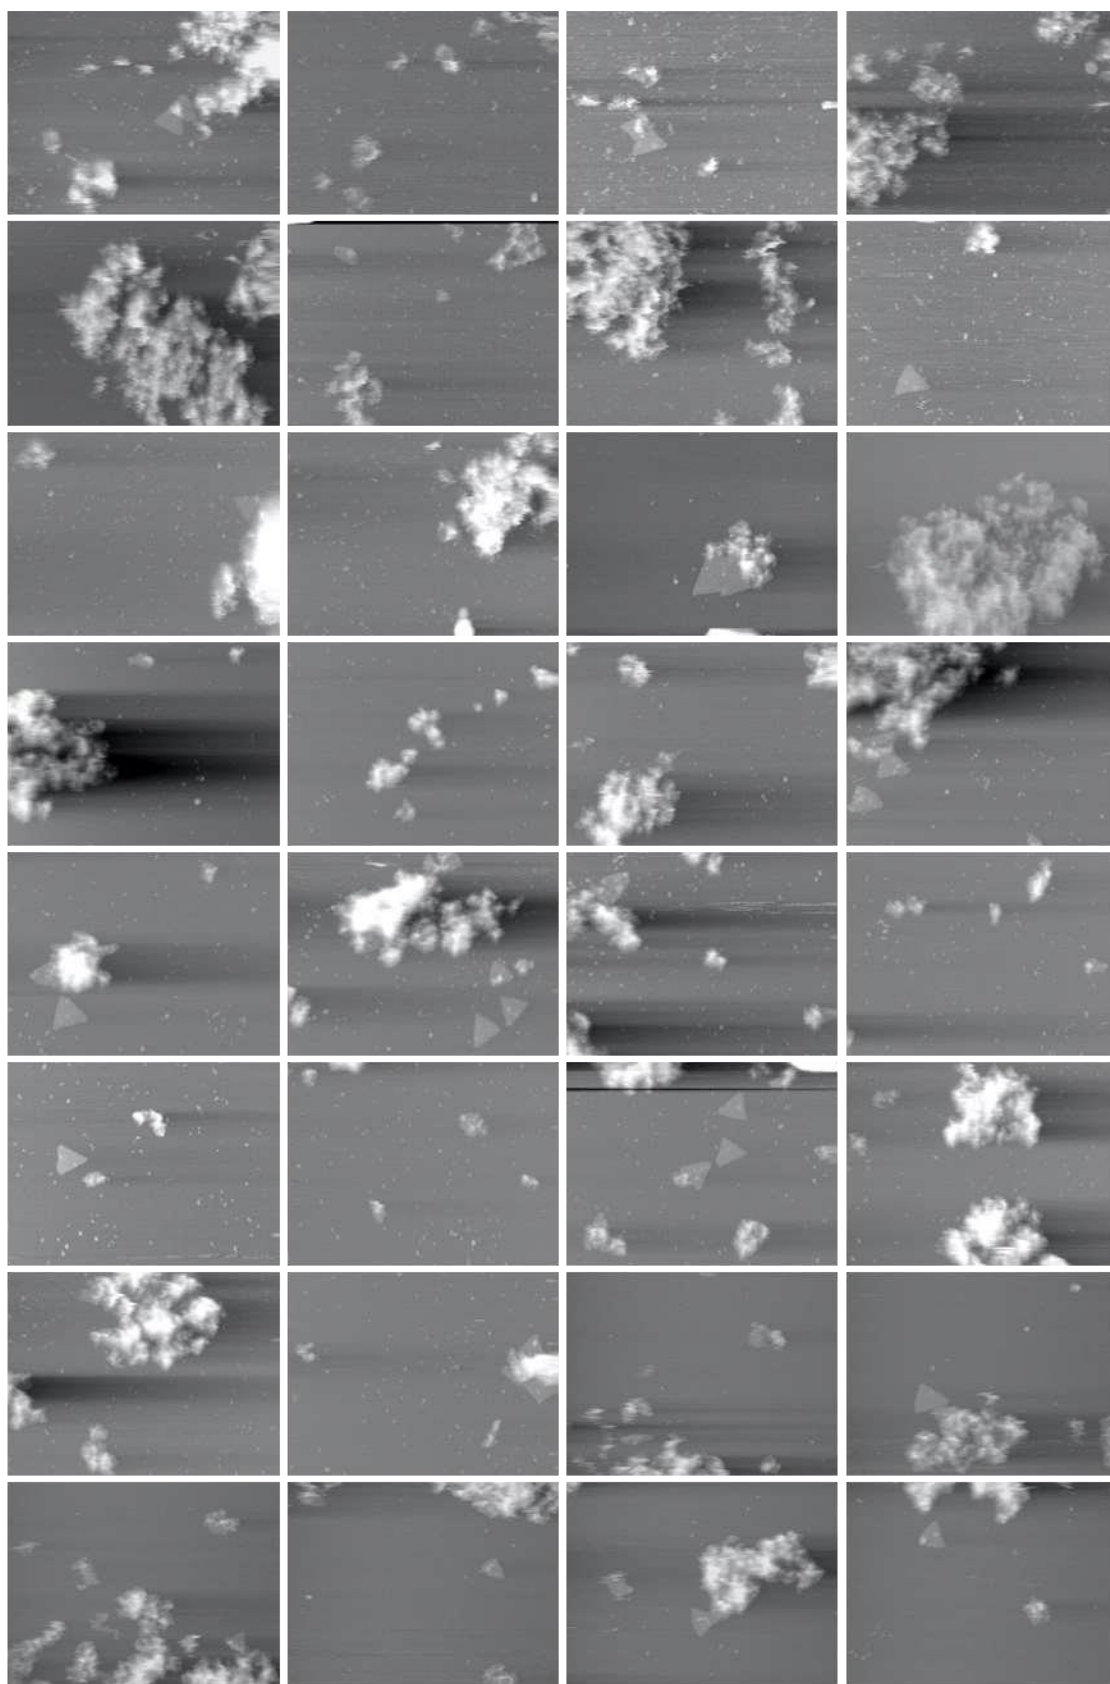

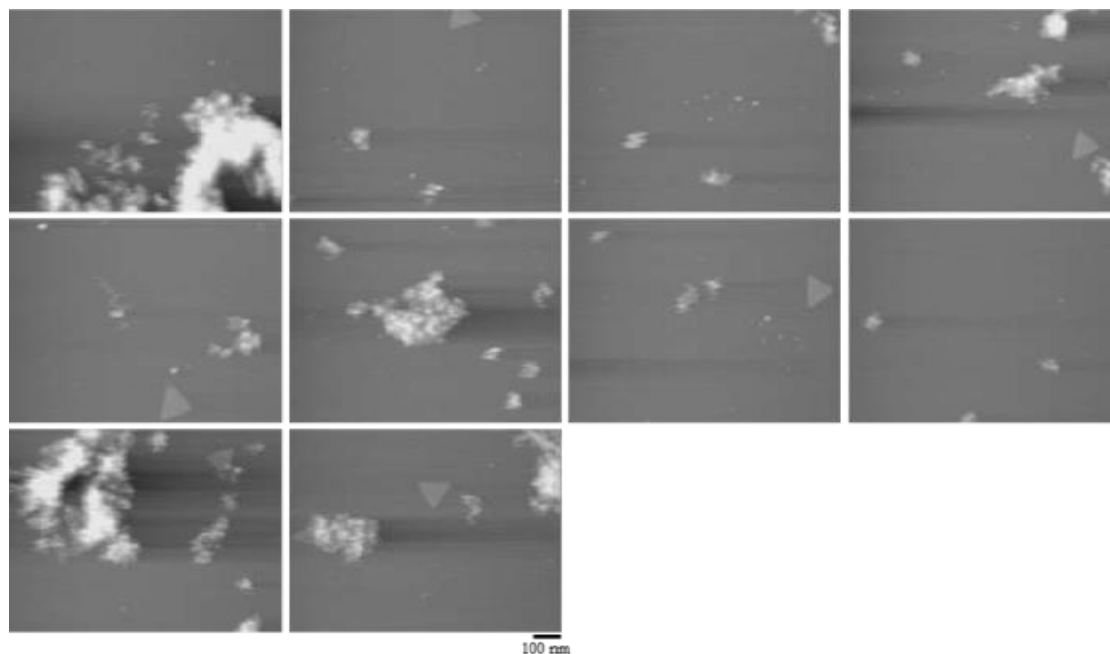

169

170 **Figure S17.** AFM image set of the DNA truss structures in “large”-sized droplets under  
171 “Quick\_1min” annealing conditions.

172

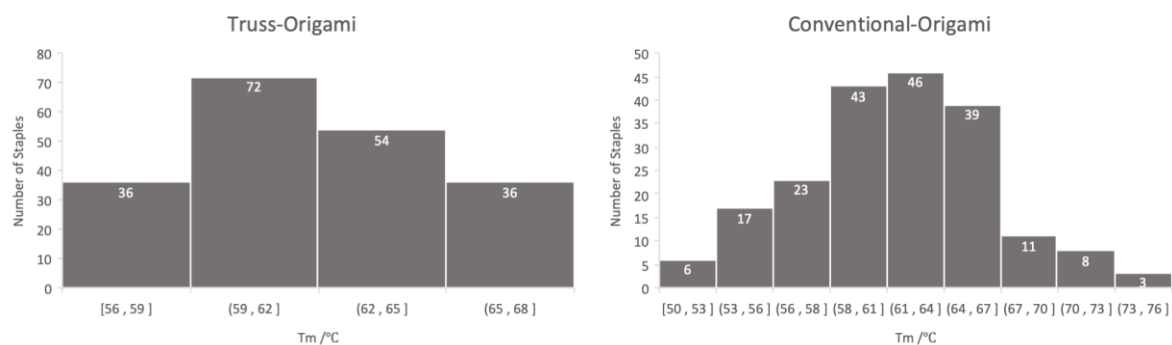

173

174 **Figure S18.** Distributions of the melting temperature of the staple DNA set used for the DNA  
 175 origamis. The average values are: Truss-Origami:  $62.2 \pm 2.8^\circ\text{C}$ ; Conventional-Origami:  $61.8 \pm 4.8^\circ\text{C}$ .

176

177 **Table S1.** Staple strand sequences of the used DNA origamis of the Truss structure. Their melting  
 178 temperature was calculated using an online tool  
 179 (<http://biotools.nubic.northwestern.edu/OligoCalc.html>) based on the Wallace formula (Wallace  
 180 RB *et al.* (1979) *Nucleic Acids Res* 6:3543-3557).

181

| staple    | sequence                                    | length | Tm/°C |
|-----------|---------------------------------------------|--------|-------|
| Truss-S1  | ATATAGAAGGCTTATCCGGTATTCTAAGAACGCGAGGCGTTTT | 43 nt  | 66.3  |
| Truss-S2  | TCAAGATTAGTTGCTATTTTCGCCAATAGCAAGCAAATCAG   | 41 nt  | 64.6  |
| Truss-S3  | TCGTAGGAATCATTACTGCACCCAGCTACAAT            | 32 nt  | 63.1  |
| Truss-S4  | CAAGAAAAATAATATCTTTTTAGCCGTTTTTATTTTCA      | 38 nt  | 56.3  |
| Truss-S5  | CACTCATCGAGAACAAGCCATCCTAATTTACGAGCA        | 37 nt  | 66.1  |
| Truss-S6  | TTTATCCTGAATCTTAGGTATTAACCAAGTACCG          | 35 nt  | 60.6  |
| Truss-S7  | TATCATTCCAAGAACGAAATGAAAATAGCAGC            | 32 nt  | 59.3  |
| Truss-S8  | CAACGGAGATTTGTATATCGGCTGTCTTTCCT            | 32 nt  | 63.1  |
| Truss-S9  | TGTAGAAACCAATCAATACATGTTTCAGCTAATGCAGA      | 37 nt  | 61.7  |
| Truss-S10 | AGAGGCATTTTCGAGCTTTTTAATAGATAAGTCCTGAA      | 38 nt  | 61.7  |
| Truss-S11 | ACGCGCCTGTTTATCAACCAGTAATAAGAGAATATAA       | 37 nt  | 61.7  |
| Truss-S12 | ATATAGAAGGCTTATCCGGTATTCTAAGAACGCGAGGCGTTTT | 35 nt  | 66.3  |
| Truss-S13 | TCAAGATTAGTTGCTATTTTCGCCAATAGCAAGCAAATCAG   | 34 nt  | 64.6  |
| Truss-S14 | TCGTAGGAATCATTACTGCACCCAGCTACAAT            | 37 nt  | 63.1  |
| Truss-S15 | CAAGAAAAATAATATCTTTTTAGCCGTTTTTATTTTCA      | 38 nt  | 56.3  |
| Truss-S16 | CACTCATCGAGAACAAGCCATCCTAATTTACGAGCA        | 37 nt  | 66.1  |
| Truss-S17 | TTTATCCTGAATCTTAGGTATTAACCAAGTACCG          | 32 nt  | 60.6  |
| Truss-S18 | TATCATTCCAAGAACGAAATGAAAATAGCAGC            | 33 nt  | 59.3  |
| Truss-S19 | CAACGGAGATTTGTATATCGGCTGTCTTTCCT            | 37 nt  | 63.1  |
| Truss-S20 | TGTAGAAACCAATCAATACATGTTTCAGCTAATGCAGA      | 38 nt  | 61.7  |
| Truss-S21 | AGAGGCATTTTCGAGCTTTTTAATAGATAAGTCCTGAA      | 37 nt  | 61.7  |
| Truss-S22 | ACGCGCCTGTTTATCAACCAGTAATAAGAGAATATAA       | 35 nt  | 61.7  |
| Truss-S23 | ATATAGAAGGCTTATCCGGTATTCTAAGAACGCGAGGCGTTTT | 34 nt  | 66.3  |
| Truss-S24 | TCAAGATTAGTTGCTATTTTCGCCAATAGCAAGCAAATCAG   | 37 nt  | 64.6  |

|           |                                             |       |      |
|-----------|---------------------------------------------|-------|------|
| Truss-S25 | TCGTAGGAATCATTACTGCACCCAGCTACAAT            | 38 nt | 63.1 |
| Truss-S26 | CAAGAAAATAATATCTTTTTAGCCGTTTTTATTTTCA       | 37 nt | 56.3 |
| Truss-S27 | CACTCATCGAGAACAAGCCCATCTAATTTACGAGCA        | 32 nt | 66.1 |
| Truss-S28 | TTTATCCTGAATCTTAGGTATTAACCAAGTACCG          | 32 nt | 60.6 |
| Truss-S29 | TATCATTCCAAGAACGAAATGAAAATAGCAGC            | 37 nt | 59.3 |
| Truss-S30 | CAACGGAGATTTGTATATCGGCTGTCTTTCCT            | 38 nt | 63.1 |
| Truss-S31 | TGTAGAAACCAATCAATACATGTTTCAGCTAATGCAGA      | 37 nt | 61.7 |
| Truss-S32 | AGAGGCATTTTCGAGCTTTTTAATAGATAAGTCCTGAA      | 35 nt | 61.7 |
| Truss-S33 | ACGCGCCTGTTTATCAACCAGTAATAAGAGAATATAA       | 34 nt | 61.7 |
| Truss-S34 | ATATAGAAGGCTTATCCGGTATTCTAAGAACGCGAGGCGTTTT | 37 nt | 66.3 |
| Truss-S35 | TCAAGATTAGTTGCTATTTTCGCCAATAGCAAGCAAATCAG   | 38 nt | 64.6 |
| Truss-S36 | TCGTAGGAATCATTACTGCACCCAGCTACAAT            | 37 nt | 63.1 |
| Truss-S37 | CAAGAAAATAATATCTTTTTAGCCGTTTTTATTTTCA       | 32 nt | 56.3 |
| Truss-S38 | CACTCATCGAGAACAAGCCCATCTAATTTACGAGCA        | 32 nt | 66.1 |
| Truss-S39 | TTTATCCTGAATCTTAGGTATTAACCAAGTACCG          | 37 nt | 60.6 |
| Truss-S40 | TATCATTCCAAGAACGAAATGAAAATAGCAGC            | 38 nt | 59.3 |
| Truss-S41 | CAACGGAGATTTGTATATCGGCTGTCTTTCCT            | 37 nt | 63.1 |
| Truss-S42 | TGTAGAAACCAATCAATACATGTTTCAGCTAATGCAGA      | 35 nt | 61.7 |
| Truss-S43 | AGAGGCATTTTCGAGCTTTTTAATAGATAAGTCCTGAA      | 34 nt | 61.7 |
| Truss-S44 | ACGCGCCTGTTTATCAACCAGTAATAAGAGAATATAA       | 34 nt | 61.7 |
| Truss-S45 | ATATAGAAGGCTTATCCGGTATTCTAAGAACGCGAGGCGTTTT | 33 nt | 66.3 |
| Truss-S46 | TCAAGATTAGTTGCTATTTTCGCCAATAGCAAGCAAATCAG   | 40 nt | 64.6 |
| Truss-S47 | TCGTAGGAATCATTACTGCACCCAGCTACAAT            | 43 nt | 63.1 |
| Truss-S48 | CAAGAAAATAATATCTTTTTAGCCGTTTTTATTTTCA       | 40 nt | 56.3 |
| Truss-S49 | CACTCATCGAGAACAAGCCCATCTAATTTACGAGCA        | 37 nt | 66.1 |
| Truss-S50 | TTTATCCTGAATCTTAGGTATTAACCAAGTACCG          | 37 nt | 60.6 |
| Truss-S51 | TATCATTCCAAGAACGAAATGAAAATAGCAGC            | 38 nt | 59.3 |
| Truss-S52 | CAACGGAGATTTGTATATCGGCTGTCTTTCCT            | 34 nt | 63.1 |
| Truss-S53 | TGTAGAAACCAATCAATACATGTTTCAGCTAATGCAGA      | 35 nt | 61.7 |
| Truss-S54 | AGAGGCATTTTCGAGCTTTTTAATAGATAAGTCCTGAA      | 37 nt | 61.7 |
| Truss-S55 | ACGCGCCTGTTTATCAACCAGTAATAAGAGAATATAA       | 32 nt | 61.7 |
| Truss-S56 | ATATAGAAGGCTTATCCGGTATTCTAAGAACGCGAGGCGTTTT | 35 nt | 66.3 |
| Truss-S57 | TCAAGATTAGTTGCTATTTTCGCCAATAGCAAGCAAATCAG   | 37 nt | 64.6 |
| Truss-S58 | TCGTAGGAATCATTACTGCACCCAGCTACAAT            | 35 nt | 63.1 |
| Truss-S59 | CAAGAAAATAATATCTTTTTAGCCGTTTTTATTTTCA       | 35 nt | 56.3 |
| Truss-S60 | CACTCATCGAGAACAAGCCCATCTAATTTACGAGCA        | 32 nt | 66.1 |
| Truss-S61 | TTTATCCTGAATCTTAGGTATTAACCAAGTACCG          | 36 nt | 60.6 |
| Truss-S62 | TATCATTCCAAGAACGAAATGAAAATAGCAGC            | 38 nt | 59.3 |
| Truss-S63 | CAACGGAGATTTGTATATCGGCTGTCTTTCCT            | 35 nt | 63.1 |
| Truss-S64 | TGTAGAAACCAATCAATACATGTTTCAGCTAATGCAGA      | 37 nt | 61.7 |
| Truss-S65 | AGAGGCATTTTCGAGCTTTTTAATAGATAAGTCCTGAA      | 35 nt | 61.7 |
| Truss-S66 | ACGCGCCTGTTTATCAACCAGTAATAAGAGAATATAA       | 35 nt | 61.7 |
| Truss-S67 | ATATAGAAGGCTTATCCGGTATTCTAAGAACGCGAGGCGTTTT | 35 nt | 66.3 |

|            |                                             |       |      |
|------------|---------------------------------------------|-------|------|
| Truss-S68  | TCAAGATTAGTTGCTATTTTCGCCCAATAGCAAGCAAATCAG  | 37 nt | 64.6 |
| Truss-S69  | TCGTAGGAATCATTACTGCACCCAGCTACAAT            | 37 nt | 63.1 |
| Truss-S70  | CAAGAAAAATAATATCTTTTTAGCCGTTTTTATTTTCA      | 35 nt | 56.3 |
| Truss-S71  | CACTCATCGAGAACAAGCCCATCCTAATTTACGAGCA       | 34 nt | 66.1 |
| Truss-S72  | TTTATCCTGAATCTTAGGTATTAACCAAGTACCG          | 37 nt | 60.6 |
| Truss-S73  | TATCATTCCAAGAACGAAATGAAAATAGCAGC            | 37 nt | 59.3 |
| Truss-S74  | CAACGGAGATTTGTATATCGGCTGTCTTTCCT            | 32 nt | 63.1 |
| Truss-S75  | TGTAGAAACCAATCAATACATGTTTCAGCTAATGCAGA      | 34 nt | 61.7 |
| Truss-S76  | AGAGGCATTTTCGAGCTTTTTAATAGATAAGTCCTGAA      | 35 nt | 61.7 |
| Truss-S77  | ACGCGCCTGTTTATCAACCAGTAATAAGAGAATATAA       | 34 nt | 61.7 |
| Truss-S78  | ATATAGAAGGCTTATCCGGTATTCTAAGAACGCGAGGCGTTTT | 35 nt | 66.3 |
| Truss-S79  | TCAAGATTAGTTGCTATTTTCGCCCAATAGCAAGCAAATCAG  | 34 nt | 64.6 |
| Truss-S80  | TCGTAGGAATCATTACTGCACCCAGCTACAAT            | 37 nt | 63.1 |
| Truss-S81  | CAAGAAAAATAATATCTTTTTAGCCGTTTTTATTTTCA      | 36 nt | 56.3 |
| Truss-S82  | CACTCATCGAGAACAAGCCCATCCTAATTTACGAGCA       | 35 nt | 66.1 |
| Truss-S83  | TTTATCCTGAATCTTAGGTATTAACCAAGTACCG          | 32 nt | 60.6 |
| Truss-S84  | TATCATTCCAAGAACGAAATGAAAATAGCAGC            | 36 nt | 59.3 |
| Truss-S85  | CAACGGAGATTTGTATATCGGCTGTCTTTCCT            | 38 nt | 63.1 |
| Truss-S86  | TGTAGAAACCAATCAATACATGTTTCAGCTAATGCAGA      | 35 nt | 61.7 |
| Truss-S87  | AGAGGCATTTTCGAGCTTTTTAATAGATAAGTCCTGAA      | 38 nt | 61.7 |
| Truss-S88  | ACGCGCCTGTTTATCAACCAGTAATAAGAGAATATAA       | 35 nt | 61.7 |
| Truss-S89  | ATATAGAAGGCTTATCCGGTATTCTAAGAACGCGAGGCGTTTT | 35 nt | 66.3 |
| Truss-S90  | TCAAGATTAGTTGCTATTTTCGCCCAATAGCAAGCAAATCAG  | 34 nt | 64.6 |
| Truss-S91  | TCGTAGGAATCATTACTGCACCCAGCTACAAT            | 37 nt | 63.1 |
| Truss-S92  | CAAGAAAAATAATATCTTTTTAGCCGTTTTTATTTTCA      | 37 nt | 56.3 |
| Truss-S93  | CACTCATCGAGAACAAGCCCATCCTAATTTACGAGCA       | 35 nt | 66.1 |
| Truss-S94  | TTTATCCTGAATCTTAGGTATTAACCAAGTACCG          | 34 nt | 60.6 |
| Truss-S95  | TATCATTCCAAGAACGAAATGAAAATAGCAGC            | 37 nt | 59.3 |
| Truss-S96  | CAACGGAGATTTGTATATCGGCTGTCTTTCCT            | 37 nt | 63.1 |
| Truss-S97  | TGTAGAAACCAATCAATACATGTTTCAGCTAATGCAGA      | 35 nt | 61.7 |
| Truss-S98  | AGAGGCATTTTCGAGCTTTTTAATAGATAAGTCCTGAA      | 34 nt | 61.7 |
| Truss-S99  | ACGCGCCTGTTTATCAACCAGTAATAAGAGAATATAA       | 37 nt | 61.7 |
| Truss-S100 | ATATAGAAGGCTTATCCGGTATTCTAAGAACGCGAGGCGTTTT | 37 nt | 66.3 |
| Truss-S101 | TCAAGATTAGTTGCTATTTTCGCCCAATAGCAAGCAAATCAG  | 35 nt | 64.6 |
| Truss-S102 | TCGTAGGAATCATTACTGCACCCAGCTACAAT            | 34 nt | 63.1 |
| Truss-S103 | CAAGAAAAATAATATCTTTTTAGCCGTTTTTATTTTCA      | 37 nt | 56.3 |
| Truss-S104 | CACTCATCGAGAACAAGCCCATCCTAATTTACGAGCA       | 37 nt | 66.1 |
| Truss-S105 | TTTATCCTGAATCTTAGGTATTAACCAAGTACCG          | 32 nt | 60.6 |
| Truss-S106 | TATCATTCCAAGAACGAAATGAAAATAGCAGC            | 34 nt | 59.3 |
| Truss-S107 | CAACGGAGATTTGTATATCGGCTGTCTTTCCT            | 35 nt | 63.1 |
| Truss-S108 | TGTAGAAACCAATCAATACATGTTTCAGCTAATGCAGA      | 34 nt | 61.7 |
| Truss-S109 | AGAGGCATTTTCGAGCTTTTTAATAGATAAGTCCTGAA      | 35 nt | 61.7 |
| Truss-S110 | ACGCGCCTGTTTATCAACCAGTAATAAGAGAATATAA       | 34 nt | 61.7 |

|            |                                             |       |      |
|------------|---------------------------------------------|-------|------|
| Truss-S111 | ATATAGAAGGCTTATCCGGTATTCTAAGAACGCGAGGCGTTTT | 35 nt | 66.3 |
| Truss-S112 | TCAAGATTAGTTGCTATTTTCGCCCAATAGCAAGCAAATCAG  | 34 nt | 64.6 |
| Truss-S113 | TCGTAGGAATCATTACTGCACCCAGCTACAAT            | 35 nt | 63.1 |
| Truss-S114 | CAAGAAAAATAATATCTTTTTAGCCGTTTTTATTTTCA      | 35 nt | 56.3 |
| Truss-S115 | CACTCATCGAGAACAAGCCCATCTAATTTACGAGCA        | 37 nt | 66.1 |
| Truss-S116 | TTTATCCTGAATCTTAGGTATTAACCAAGTACCG          | 35 nt | 60.6 |
| Truss-S117 | TATCATTCCAAGAACGAAATGAAAATAGCAGC            | 35 nt | 59.3 |
| Truss-S118 | CAACGGAGATTTGTATATCGGCTGTCTTTCCT            | 32 nt | 63.1 |
| Truss-S119 | TGTAGAAACCAATCAATACATGTTTCAGCTAATGCAGA      | 36 nt | 61.7 |
| Truss-S120 | AGAGGCATTTTCGAGCTTTTTAATAGATAAGTCCTGAA      | 38 nt | 61.7 |
| Truss-S121 | ACGCGCCTGTTTATCAACCAGTAATAAGAGAATATAA       | 35 nt | 61.7 |
| Truss-S122 | ATATAGAAGGCTTATCCGGTATTCTAAGAACGCGAGGCGTTTT | 37 nt | 66.3 |
| Truss-S123 | TCAAGATTAGTTGCTATTTTCGCCCAATAGCAAGCAAATCAG  | 35 nt | 64.6 |
| Truss-S124 | TCGTAGGAATCATTACTGCACCCAGCTACAAT            | 35 nt | 63.1 |
| Truss-S125 | CAAGAAAAATAATATCTTTTTAGCCGTTTTTATTTTCA      | 35 nt | 56.3 |
| Truss-S126 | CACTCATCGAGAACAAGCCCATCTAATTTACGAGCA        | 37 nt | 66.1 |
| Truss-S127 | TTTATCCTGAATCTTAGGTATTAACCAAGTACCG          | 37 nt | 60.6 |
| Truss-S128 | TATCATTCCAAGAACGAAATGAAAATAGCAGC            | 35 nt | 59.3 |
| Truss-S129 | CAACGGAGATTTGTATATCGGCTGTCTTTCCT            | 34 nt | 63.1 |
| Truss-S130 | TGTAGAAACCAATCAATACATGTTTCAGCTAATGCAGA      | 37 nt | 61.7 |
| Truss-S131 | AGAGGCATTTTCGAGCTTTTTAATAGATAAGTCCTGAA      | 37 nt | 61.7 |
| Truss-S132 | ACGCGCCTGTTTATCAACCAGTAATAAGAGAATATAA       | 35 nt | 61.7 |
| Truss-S133 | ATATAGAAGGCTTATCCGGTATTCTAAGAACGCGAGGCGTTTT | 34 nt | 66.3 |
| Truss-S134 | TCAAGATTAGTTGCTATTTTCGCCCAATAGCAAGCAAATCAG  | 37 nt | 64.6 |
| Truss-S135 | TCGTAGGAATCATTACTGCACCCAGCTACAAT            | 37 nt | 63.1 |
| Truss-S136 | CAAGAAAAATAATATCTTTTTAGCCGTTTTTATTTTCA      | 35 nt | 56.3 |
| Truss-S137 | CACTCATCGAGAACAAGCCCATCTAATTTACGAGCA        | 34 nt | 66.1 |
| Truss-S138 | TTTATCCTGAATCTTAGGTATTAACCAAGTACCG          | 37 nt | 60.6 |
| Truss-S139 | TATCATTCCAAGAACGAAATGAAAATAGCAGC            | 37 nt | 59.3 |
| Truss-S140 | CAACGGAGATTTGTATATCGGCTGTCTTTCCT            | 35 nt | 63.1 |
| Truss-S141 | TGTAGAAACCAATCAATACATGTTTCAGCTAATGCAGA      | 34 nt | 61.7 |
| Truss-S142 | AGAGGCATTTTCGAGCTTTTTAATAGATAAGTCCTGAA      | 37 nt | 61.7 |
| Truss-S143 | ACGCGCCTGTTTATCAACCAGTAATAAGAGAATATAA       | 37 nt | 61.7 |
| Truss-S144 | ATATAGAAGGCTTATCCGGTATTCTAAGAACGCGAGGCGTTTT | 35 nt | 66.3 |
| Truss-S145 | TCAAGATTAGTTGCTATTTTCGCCCAATAGCAAGCAAATCAG  | 34 nt | 64.6 |
| Truss-S146 | TCGTAGGAATCATTACTGCACCCAGCTACAAT            | 37 nt | 63.1 |
| Truss-S147 | CAAGAAAAATAATATCTTTTTAGCCGTTTTTATTTTCA      | 37 nt | 56.3 |
| Truss-S148 | CACTCATCGAGAACAAGCCCATCTAATTTACGAGCA        | 32 nt | 66.1 |
| Truss-S149 | TTTATCCTGAATCTTAGGTATTAACCAAGTACCG          | 34 nt | 60.6 |
| Truss-S150 | TATCATTCCAAGAACGAAATGAAAATAGCAGC            | 35 nt | 59.3 |
| Truss-S151 | CAACGGAGATTTGTATATCGGCTGTCTTTCCT            | 34 nt | 63.1 |
| Truss-S152 | TGTAGAAACCAATCAATACATGTTTCAGCTAATGCAGA      | 35 nt | 61.7 |
| Truss-S153 | AGAGGCATTTTCGAGCTTTTTAATAGATAAGTCCTGAA      | 34 nt | 61.7 |



|            |                                             |       |      |
|------------|---------------------------------------------|-------|------|
| Truss-S154 | ACGCGCCTGTTTATCAACCAGTAATAAGAGAATATAA       | 35 nt | 61.7 |
| Truss-S155 | ATATAGAAGGCTTATCCGGTATTCTAAGAACGCGAGGCGTTTT | 34 nt | 66.3 |
| Truss-S156 | TCAAGATTAGTTGCTATTTTCGCCAATAGCAAGCAAATCAG   | 35 nt | 64.6 |
| Truss-S157 | TCGTAGGAATCATTACTGCACCCAGCTACAAT            | 34 nt | 63.1 |
| Truss-S158 | CAAGAAAATAATATCTTTTTAGCCGTTTTTATTTTCA       | 35 nt | 56.3 |
| Truss-S159 | CACTCATCGAGAACAAGCCCATCCTAATTTACGAGCA       | 34 nt | 66.1 |
| Truss-S160 | TTTATCCTGAATCTTAGGTATTAACCAAGTACCG          | 35 nt | 60.6 |
| Truss-S161 | TATCATTCCAAGAACGAAATGAAAATAGCAGC            | 35 nt | 59.3 |
| Truss-S162 | CAACGGAGATTTGTATATCGGCTGTCTTTCCT            | 37 nt | 63.1 |
| Truss-S163 | TGTAGAAACCAATCAATACATGTTTCAGCTAATGCAGA      | 36 nt | 61.7 |
| Truss-S164 | AGAGGCATTTTCGAGCTTTTTAATAGATAAGTCCTGAA      | 33 nt | 61.7 |
| Truss-S165 | ACGCGCCTGTTTATCAACCAGTAATAAGAGAATATAA       | 35 nt | 61.7 |
| Truss-S166 | ATATAGAAGGCTTATCCGGTATTCTAAGAACGCGAGGCGTTTT | 36 nt | 66.3 |
| Truss-S167 | TCAAGATTAGTTGCTATTTTCGCCAATAGCAAGCAAATCAG   | 37 nt | 64.6 |
| Truss-S168 | TCGTAGGAATCATTACTGCACCCAGCTACAAT            | 40 nt | 63.1 |
| Truss-S169 | CAAGAAAATAATATCTTTTTAGCCGTTTTTATTTTCA       | 43 nt | 56.3 |
| Truss-S170 | CACTCATCGAGAACAAGCCCATCCTAATTTACGAGCA       | 40 nt | 66.1 |
| Truss-S171 | TTTATCCTGAATCTTAGGTATTAACCAAGTACCG          | 37 nt | 60.6 |
| Truss-S172 | TATCATTCCAAGAACGAAATGAAAATAGCAGC            | 37 nt | 59.3 |
| Truss-S173 | CAACGGAGATTTGTATATCGGCTGTCTTTCCT            | 38 nt | 63.1 |
| Truss-S174 | TGTAGAAACCAATCAATACATGTTTCAGCTAATGCAGA      | 37 nt | 61.7 |
| Truss-S175 | AGAGGCATTTTCGAGCTTTTTAATAGATAAGTCCTGAA      | 37 nt | 61.7 |
| Truss-S176 | ACGCGCCTGTTTATCAACCAGTAATAAGAGAATATAA       | 38 nt | 61.7 |
| Truss-S177 | ATATAGAAGGCTTATCCGGTATTCTAAGAACGCGAGGCGTTTT | 37 nt | 66.3 |
| Truss-S178 | TCAAGATTAGTTGCTATTTTCGCCAATAGCAAGCAAATCAG   | 37 nt | 64.6 |
| Truss-S179 | TCGTAGGAATCATTACTGCACCCAGCTACAAT            | 38 nt | 63.1 |
| Truss-S180 | CAAGAAAATAATATCTTTTTAGCCGTTTTTATTTTCA       | 37 nt | 56.3 |
| Truss-S181 | CACTCATCGAGAACAAGCCCATCCTAATTTACGAGCA       | 37 nt | 66.1 |
| Truss-S182 | TTTATCCTGAATCTTAGGTATTAACCAAGTACCG          | 38 nt | 60.6 |
| Truss-S183 | TATCATTCCAAGAACGAAATGAAAATAGCAGC            | 37 nt | 59.3 |
| Truss-S184 | CAACGGAGATTTGTATATCGGCTGTCTTTCCT            | 37 nt | 63.1 |
| Truss-S185 | TGTAGAAACCAATCAATACATGTTTCAGCTAATGCAGA      | 38 nt | 61.7 |
| Truss-S186 | AGAGGCATTTTCGAGCTTTTTAATAGATAAGTCCTGAA      | 37 nt | 61.7 |
| Truss-S187 | ACGCGCCTGTTTATCAACCAGTAATAAGAGAATATAA       | 37 nt | 61.7 |
| Truss-S188 | ATATAGAAGGCTTATCCGGTATTCTAAGAACGCGAGGCGTTTT | 38 nt | 66.3 |
| Truss-S189 | TCAAGATTAGTTGCTATTTTCGCCAATAGCAAGCAAATCAG   | 37 nt | 64.6 |
| Truss-S190 | TCGTAGGAATCATTACTGCACCCAGCTACAAT            | 37 nt | 63.1 |
| Truss-S191 | CAAGAAAATAATATCTTTTTAGCCGTTTTTATTTTCA       | 38 nt | 56.3 |
| Truss-S192 | CACTCATCGAGAACAAGCCCATCCTAATTTACGAGCA       | 37 nt | 66.1 |
| Truss-S193 | TTTATCCTGAATCTTAGGTATTAACCAAGTACCG          | 38 nt | 60.6 |
| Truss-S194 | TATCATTCCAAGAACGAAATGAAAATAGCAGC            | 38 nt | 59.3 |
| Truss-S195 | CAACGGAGATTTGTATATCGGCTGTCTTTCCT            | 37 nt | 63.1 |
| Truss-S196 | TGTAGAAACCAATCAATACATGTTTCAGCTAATGCAGA      | 37 nt | 61.7 |

|            |                                        |       |      |
|------------|----------------------------------------|-------|------|
| Truss-S197 | AGAGGCATTTTCGAGCTTTTTAATAGATAAGTCCTGAA | 40 nt | 61.7 |
| Truss-S198 | ACGCGCCTGTTTATCAACCAGTAATAAGAGAATATAA  | 37 nt | 61.7 |

182

183

**Table S2.** Staple strand sequences of the used DNA origami of the conventional structure.

| staple      | sequence                        | length | Tm/°C |
|-------------|---------------------------------|--------|-------|
| Origami-S1  | ATACCTAACAATATTACCGCCA          | 22 nt  | 53.0  |
| Origami-S2  | TAATTCGAAAAAAGATTAAGAGG         | 23 nt  | 49.8  |
| Origami-S3  | CAGGAGGCCGATTAAAGGGATTTT        | 24 nt  | 58.8  |
| Origami-S4  | GCCCAATAAATCAAGATTAGTTGC        | 24 nt  | 55.3  |
| Origami-S5  | AGCCATATTATTTATCGACGGGAG        | 24 nt  | 57.1  |
| Origami-S6  | TATGGGATCCAAAAAAGGCTCC          | 24 nt  | 57.1  |
| Origami-S7  | TAAAACGAAAGAGGCATGTGTCGA        | 24 nt  | 57.1  |
| Origami-S8  | AAACCCTGCAAATGAAAATCTACCACCAG   | 30 nt  | 60.5  |
| Origami-S9  | TAATACAATCTTTAGGAGCACTCAAATATC  | 30 nt  | 56.4  |
| Origami-S10 | AAGCCCAAGCTATCTTACCGAAGCCCTTTT  | 30 nt  | 63.3  |
| Origami-S11 | TCACGACGGTGCTGCAAGGCGATCCATTCA  | 30 nt  | 67.4  |
| Origami-S12 | CAAATTCAATTACCTGAGCAATCGGGAGA   | 30 nt  | 60.5  |
| Origami-S13 | ATTAACCGGCCGCCACCAGAACCGCCACCA  | 30 nt  | 70.1  |
| Origami-S14 | CATCTGCCATGGGATAGGTCACGCCAGCTT  | 30 nt  | 67.4  |
| Origami-S15 | GCAACAGCCGTATTGGGCGCCAGACTGCCC  | 30 nt  | 71.5  |
| Origami-S16 | CCCTCGTGTCCAATACTGCGGAATGCTTTA  | 30 nt  | 64.6  |
| Origami-S17 | AATTGCTGGCTCCTTTTGATAAGCGGTTTT  | 30 nt  | 61.9  |
| Origami-S18 | AGGAGGTATGTACCGTAACACTGTAGCATT  | 30 nt  | 61.9  |
| Origami-S19 | TTAGAACATATAATCCTGATTGATTTTGCG  | 30 nt  | 56.4  |
| Origami-S20 | AACAATAAACGTCAGATGAATATGGAAGGG  | 30 nt  | 59.2  |
| Origami-S21 | TTTTCCCTGTGAGTGAATAACCCAAGAAAA  | 30 nt  | 59.2  |
| Origami-S22 | GGCTGCGCCGCTTCTGGTGCCGGAACCGTG  | 30 nt  | 74.2  |
| Origami-S23 | GAAGCCTTCGGTTGTACCAAAAATTAACAT  | 30 nt  | 59.2  |
| Origami-S24 | TAGGTTGTATCAAAATCATAGGTTAATTAA  | 30 nt  | 53.7  |
| Origami-S25 | AATTACCTAACGAGCGTCTTTCCAATCTTA  | 30 nt  | 59.2  |
| Origami-S26 | AGTTTGACTTCCATATAACAGTTAGAGCTT  | 30 nt  | 57.8  |
| Origami-S27 | GCTTTCCAATGAGTGAGCTAACCCGTGTGT  | 30 nt  | 63.3  |
| Origami-S28 | CCACAGACAACAGTTTCAGCGGGCGAATAA  | 30 nt  | 64.6  |
| Origami-S29 | AATGGTTTTTTTTCAAATATATTCTCCGGCT | 30 nt  | 56.4  |
| Origami-S30 | TAGCTTAGTACAATTTTATCCTGTATTTTG  | 30 nt  | 55.1  |
| Origami-S31 | AACGGGTATAGAAGGCTTATCCGCTCCCGA  | 30 nt  | 66.0  |
| Origami-S32 | GAAGAAAAGATACATAACGCCATATCATAA  | 30 nt  | 56.4  |
| Origami-S33 | GTAACAACAGTCAGAGGGTAATTGAACACC  | 30 nt  | 60.5  |
| Origami-S34 | TGATGCAATTCATCGTAGGAATCCAAGCCG  | 30 nt  | 63.3  |
| Origami-S35 | GAAATTGTACCGAGCTCGAATTCTTCCCAG  | 30 nt  | 63.3  |
| Origami-S36 | AATCAACACTTATTACGCAGTATGCATGAT  | 30 nt  | 57.8  |
| Origami-S37 | AAAATCACCAGTAGCACCATTACCCATCGA  | 30 nt  | 61.9  |
| Origami-S38 | ATCATCATGGAAACCGAGGAAACACAAAGT  | 30 nt  | 60.5  |

|             |                                  |       |      |
|-------------|----------------------------------|-------|------|
| Origami-S39 | TACCAAGTAGTTACAAAATAAACAGAGCCT   | 30 nt | 57.8 |
| Origami-S40 | CTCCCTCAGTTGAGGCAGGTCAGTCCTCAT   | 30 nt | 67.4 |
| Origami-S41 | AATATTTTACGGAAATTATTCATGGAAGGT   | 30 nt | 55.1 |
| Origami-S42 | TTGTTTAGAGAATAACATAAAAATTGAGTT   | 30 nt | 52.3 |
| Origami-S43 | TAGCAGCATTGCCATCTTTTCATGAACCGC   | 30 nt | 63.3 |
| Origami-S44 | TTTACAAATACCCAAAAGAACTGGCAATAA   | 30 nt | 56.4 |
| Origami-S45 | GTAACGTAAGCCCCAAAACACTGGAGC      | 30 nt | 63.3 |
| Origami-S46 | TCGGAACTGCCGTGAGAGGGTCCGTACTC    | 30 nt | 70.1 |
| Origami-S47 | TCATCAACCGCCATCAAAAATAATTAAT     | 30 nt | 55.1 |
| Origami-S48 | CCAATAAATGAAAAGGTGGCATCTAGATTT   | 30 nt | 57.8 |
| Origami-S49 | ACCTGAAAGTAATAAAAAGGGACTCATGGAA  | 30 nt | 59.2 |
| Origami-S50 | CAGAAGAATAGCCCTAAAACATCCCTTCTG   | 30 nt | 61.9 |
| Origami-S51 | AAACAAGAGAGATCTACAAAGGCAGACAGT   | 30 nt | 60.5 |
| Origami-S52 | AGGCATTTTCGAGCCAGTAATAAATTCTGT   | 30 nt | 59.2 |
| Origami-S53 | AGTGTTTTTCATGGCTTTTGATGACCAGTAA  | 30 nt | 59.2 |
| Origami-S54 | CAAATCACTGTGTAGGTAAAGATTGCGGGA   | 30 nt | 61.9 |
| Origami-S55 | AAGGCGTTAACAATAGATAAGTCACGCGCC   | 30 nt | 63.3 |
| Origami-S56 | ATTAACACAACCGATTGAGGGAGAAAAGGG   | 30 nt | 61.9 |
| Origami-S57 | CCAGACGATACGAGCATGTAGAATTCCAAG   | 30 nt | 63.3 |
| Origami-S58 | TAAAGCCAGGTCAGTGCCTTGAGTTTGACG   | 30 nt | 64.6 |
| Origami-S59 | CTTTGACCCAACGGAGATTTGTAGACCAAC   | 30 nt | 63.3 |
| Origami-S60 | ATGGATTAACCGTCACCGACTTGTAAGGT    | 30 nt | 61.9 |
| Origami-S61 | GAACAAAGAACGTTATTAATTTTCAATAGA   | 30 nt | 53.7 |
| Origami-S62 | CATAAAGGTGGCAACATATAAAAATTGTCAC  | 30 nt | 57.8 |
| Origami-S63 | AGAAGAACTAGCGCGTTTTTCATCTTTAGCG  | 30 nt | 61.9 |
| Origami-S64 | CTTTCCACGGAAGCATAAAGTGTCACACAAC  | 31 nt | 63.2 |
| Origami-S65 | AACAGTTCAGAAAACGAGAATGAGTTTAGAC  | 31 nt | 59.2 |
| Origami-S66 | AATCATTGTGAATTACCTTATGCGACGTTGG  | 31 nt | 60.5 |
| Origami-S67 | CCGATAGGGAAGATCGCACTCCAGACAGTAT  | 31 nt | 65.8 |
| Origami-S68 | AAATTTTTCATTAACGGGTAATCATGAGG    | 31 nt | 56.6 |
| Origami-S69 | GCTTTGATCTCCGTGGGAACAAATAACAACC  | 31 nt | 63.2 |
| Origami-S70 | GTGAATAAAGCAATAAAGCCTCAAAGAATTA  | 31 nt | 56.6 |
| Origami-S71 | CATGTAAAATTAATGCCGGAGAAACCGTTC   | 31 nt | 60.5 |
| Origami-S72 | ACCCTGACTATTATAGTCAGAAGCAAAGCGG  | 31 nt | 63.2 |
| Origami-S73 | TTCGAGGTTGCTATTACGCCAGGATCGGTG   | 31 nt | 67.2 |
| Origami-S74 | CGTCGGATGGACTAAAGACTTTTCTACAGAG  | 31 nt | 63.2 |
| Origami-S75 | TTTTAAATGAAAGATTCATCAGTACATTATT  | 31 nt | 52.6 |
| Origami-S76 | GCTTGCATTTGTATCGGTTTATCAAAGGAG   | 31 nt | 60.5 |
| Origami-S77 | TGAGAGAGAGAAGGATTAGGATTCTGAGACT  | 31 nt | 61.9 |
| Origami-S78 | CAGCAGCGAAAGACAGCATCGGACGCATAAC  | 31 nt | 67.2 |
| Origami-S79 | CCAAATCCCTCATATATTTTAAATAAAAATT  | 31 nt | 52.6 |
| Origami-S80 | CCTCAAGTTGCAGCAAGCGGTCCCCTGGCCC  | 31 nt | 72.4 |
| Origami-S81 | GCAAACCTCGAAGTTTTGCCAGAGGAGGCTTT | 31 nt | 64.5 |

|              |                                   |       |      |
|--------------|-----------------------------------|-------|------|
| Origami-S82  | TTTGAAAGTAGGCTGGCTGACCTTCATCAAG   | 31 nt | 63.2 |
| Origami-S83  | ACTAGCATACGAAGGCACCAACCATACGTAA   | 31 nt | 63.2 |
| Origami-S84  | CAGAACGTGTTTAGCTATATTTTCAAATGGT   | 31 nt | 57.9 |
| Origami-S85  | TGCAAAACAACAGGTCAGGATTAGACCGGAA   | 31 nt | 63.2 |
| Origami-S86  | GCATTAATAGAGCCACCACCCTCAGAACCGC   | 31 nt | 67.2 |
| Origami-S87  | TAATTTTTTTCACGTTGAAAATCTTTTGCTAA  | 31 nt | 53.9 |
| Origami-S88  | CGTGACTCCAACGTCAAAGGGCTGCCTATT    | 31 nt | 67.2 |
| Origami-S89  | CGATATATTCGGTCGCTGAGGCTGTCACCCT   | 31 nt | 67.2 |
| Origami-S90  | CGGGCCTCTGAATTTCTTAAACAAGCTTGCT   | 31 nt | 63.2 |
| Origami-S91  | CGGCCTCATTGCGCCGACAATGAGCTTGATA   | 31 nt | 67.2 |
| Origami-S92  | TGTA CTGGTTAGAATCAGAGCGGGAGCTAAA  | 31 nt | 63.2 |
| Origami-S93  | TAGCTGATCTTAGCCGGAACGAGACCTGCTC   | 31 nt | 67.2 |
| Origami-S94  | AAGTTTCGTTAAATCAGCTCATTTTCGCATT   | 31 nt | 57.9 |
| Origami-S95  | CACCCTCGAATCGGCCAACGCGCTGCCAGCT   | 31 nt | 72.4 |
| Origami-S96  | CAATAACCAGTAGTAAATTGGGCAGAAACAC   | 31 nt | 60.5 |
| Origami-S97  | ACAGGTAATGCAACTAAAGTACGTCAACATG   | 31 nt | 60.5 |
| Origami-S98  | CCTTTAAGCCTGCAGGTGACTCAGTGCCAA    | 31 nt | 67.2 |
| Origami-S99  | TTTAGAACAAACGTAACAAAGCTGTTTCATTAC | 31 nt | 57.9 |
| Origami-S100 | AATTGAGAATCGCCATATTTAACAACGCCAA   | 31 nt | 59.2 |
| Origami-S101 | ATACGAGCGACGTTAGTAAATGATTTGTCGT   | 31 nt | 60.5 |
| Origami-S102 | GGGTTGAGTGTGTTCCAGTTTGAACAAGA     | 31 nt | 63.2 |
| Origami-S103 | TGCCACTGTCAATCATATGTACCATCGTAAA   | 31 nt | 60.5 |
| Origami-S104 | GCAAAATTAGGCTTGCCCTGACGCTCATTCA   | 31 nt | 64.5 |
| Origami-S105 | TGATAAATAAAGAATACACTAAAACACTCAT   | 31 nt | 53.9 |
| Origami-S106 | AGGAACCCTTAGTACCGCCACCCTGTACCAGG  | 32 nt | 69.5 |
| Origami-S107 | CTGAGTAACATCAATATGATATTCGGGTAGCT  | 32 nt | 60.6 |
| Origami-S108 | TTTTTATTATCCAATCGCAAGACAGTAAATGC  | 32 nt | 58.0 |
| Origami-S109 | AGGGGGATTTGTA AACGACGGCCTAGAGGAT  | 32 nt | 65.7 |
| Origami-S110 | TTTAACGGGAATGGAAAGCGCAGTCCAGCATT  | 32 nt | 64.4 |
| Origami-S111 | TGAACGGTTAGCAGCCTTTACAGAACGTCAA   | 32 nt | 63.1 |
| Origami-S112 | TCACCGGAACAACTACAACGCCTGAGTTTCG   | 32 nt | 65.7 |
| Origami-S113 | CGGTCATAAACCGCCACCCTCAGAACCACCAG  | 32 nt | 69.5 |
| Origami-S114 | GCGCATTACCAATCCAATAAGAAACGATTTT   | 32 nt | 59.3 |
| Origami-S115 | GTCTATCACGCGTACTATGGTTGCTAACAGTG  | 32 nt | 64.4 |
| Origami-S116 | AATAGGAAATTAATGTGAGCGAGCGGCGGAT   | 32 nt | 63.1 |
| Origami-S117 | CCCCGGGTTATCCGCTCACAATTCAAAGCCTG  | 32 nt | 68.2 |
| Origami-S118 | AGCTAAATTATTTCAACGCAAGGATGCAATGC  | 32 nt | 60.6 |
| Origami-S119 | TAATCAGATAATATTTTGTTAAAATTTTAACC  | 32 nt | 51.6 |
| Origami-S120 | CCTTGATACGGAATAGGTGTATCATGATATAA  | 32 nt | 59.3 |
| Origami-S121 | GGGTGCCTGTGCGGAAACCTGTGCGGGGAGAG  | 32 nt | 73.4 |
| Origami-S122 | TAAGAAAAGAGATAACCCACAAGAACAGGGAA  | 32 nt | 60.6 |
| Origami-S123 | GCGCGAGCTCATACAGGCAAGGCAGAGCATAA  | 32 nt | 68.2 |
| Origami-S124 | ATTTTTGAGAATCGATGAACGGTACCGGTTGA  | 32 nt | 61.8 |

|              |                                   |       |      |
|--------------|-----------------------------------|-------|------|
| Origami-S125 | CTTTAATTAATATAATGCTGTAGCGTGTCTGG  | 32 nt | 59.3 |
| Origami-S126 | AGCCAGCACAAATCAATATCTGGTCGAAGGTTA | 32 nt | 63.1 |
| Origami-S127 | TCTAAAATTTTGAGGATTTAGAAGATTAATC   | 32 nt | 54.1 |
| Origami-S128 | GTTAGCAAACGTAGAATACCAGCGCCAAAGAC  | 32 nt | 64.4 |
| Origami-S129 | AAAGTACCATTGAATCCCCCTCAAATCGTCAT  | 32 nt | 61.8 |
| Origami-S130 | AAATATTGTGAATGGCTATTAGTCGCACAGAC  | 32 nt | 60.6 |
| Origami-S131 | TAGAAAGGAACGTCACCAATGAAACATTAGCA  | 32 nt | 60.6 |
| Origami-S132 | GAAAAATAACTCATCGAGAACAAGATTACCGC  | 32 nt | 60.6 |
| Origami-S133 | ATTCATTTAATTACATTTAACAATTACATAAA  | 32 nt | 50.3 |
| Origami-S134 | TGTTTATCAAATAAGAATAAACACTGATAAAT  | 32 nt | 52.9 |
| Origami-S135 | TCACCAGTACCAGAGCCACCACCGAATCAAAA  | 32 nt | 65.7 |
| Origami-S136 | TACCAGAAATTCCTGATTATCAGAGCGGAATT  | 32 nt | 60.6 |
| Origami-S137 | TCAATATATTAGAATCCTTGAAAAGAGTCAAT  | 32 nt | 55.4 |
| Origami-S138 | TTTGCTCACAGAACCGCCACCCTCATTTTCAG  | 32 nt | 65.7 |
| Origami-S139 | GGATAGCACGTAACGATCTAAAGTATTTTCTG  | 32 nt | 60.6 |
| Origami-S140 | CTGAACAAGAAATAAAGAAATTGCATTTGCAC  | 32 nt | 58.0 |
| Origami-S141 | TCAGACTGTCAAACCTATCGGCCTTGCCTGAGT | 32 nt | 65.7 |
| Origami-S142 | AGTAAAATCCATAAATCAAAAATCAGGTCTTT  | 32 nt | 55.4 |
| Origami-S143 | CAACAACCATCGCCCAACGAGGGTAGCAACGG  | 32 nt | 69.5 |
| Origami-S144 | GACAGGAGGAGCCGCCACCCTCAGGCCCCCTT  | 32 nt | 74.6 |
| Origami-S145 | ATAATCGGATAGTAAGAGCAACACAAAGGAAT  | 32 nt | 59.3 |
| Origami-S146 | CCCTCAGATTGTAGCAATACTTCTTCACGCAA  | 32 nt | 63.1 |
| Origami-S147 | TAAGACTCGTTGAAAGGAATTGAGAGTTGGCA  | 32 nt | 61.8 |
| Origami-S148 | GCGTCATATATAATCAGTGAGGCCTCCTGAGA  | 32 nt | 64.4 |
| Origami-S149 | ACTAATGCAATCTACGTTAATAAATCAACTTT  | 32 nt | 55.4 |
| Origami-S150 | CTTGCGGGAGGTTTTGAAGCCTTAGCAAGCAA  | 32 nt | 65.7 |
| Origami-S151 | CTTTGCCCGAAACCACCAGAAGGATGATGGCA  | 32 nt | 67.0 |
| Origami-S152 | ATTCATCACTACCATATCAAAATTGTAGATTT  | 32 nt | 55.4 |
| Origami-S153 | AGTAATCTATAAGGGAACCGAACTTCATCGCC  | 32 nt | 63.1 |
| Origami-S154 | AATTTGCCTACAAAATCGCGCAGAGCTTTGAA  | 32 nt | 61.8 |
| Origami-S155 | ATCAGATATTAACCAAGTACCGCATATCCCA   | 32 nt | 60.6 |
| Origami-S156 | GTATAGCCTTCACAAACAATAAAACGATTGG   | 32 nt | 59.3 |
| Origami-S157 | TAATTAAGTACCAACGCTCAACAGTAGGGCTT  | 32 nt | 63.1 |
| Origami-S158 | AAGTTTCACATTAGATACATTTTCGCATTTGGG | 32 nt | 59.3 |
| Origami-S159 | TCAGGTTTACGGATTGCCTGATTGGCGAATT   | 32 nt | 64.4 |
| Origami-S160 | GAATTATCTTTACATTGGCAGATTCGTCTGAA  | 32 nt | 59.3 |
| Origami-S161 | ATTGCATCGCTTCAAAGCGAACCAGAGAGTAC  | 32 nt | 64.4 |
| Origami-S162 | AGGCCGGAAACAACCTAAAGGAATTAGTGAGAA | 32 nt | 61.8 |
| Origami-S163 | TTGCCCCAAAATCAAAAGAATAGCCCGAGATA  | 32 nt | 61.8 |
| Origami-S164 | AGCCGCCGCTCTGAATTTACCGTTTACAGGAG  | 32 nt | 67.0 |
| Origami-S165 | ATTAGCGTCCGTAATCAGTAGCGAGAGCCAGC  | 32 nt | 67.0 |
| Origami-S166 | CATGTAATGTTTCAGCTAATGCAGACTGAACAA | 32 nt | 60.6 |
| Origami-S167 | CCCGTATAAACAGTTAATGCCCCCGAAAAACC  | 32 nt | 64.4 |

|              |                                           |       |      |
|--------------|-------------------------------------------|-------|------|
| Origami-S168 | CCAACGCTTTTTTAATGGAAACAGTTCATTTG          | 32 nt | 59.3 |
| Origami-S169 | TGACCGTAAGTTTGAGGGGACGACGCCAGCTT          | 32 nt | 68.2 |
| Origami-S170 | AAATATTCGACAAAAGGTAAAGTAGAGAATAT          | 32 nt | 55.4 |
| Origami-S171 | CACCCAGCATTAAAGACGCTGAGAACATAGCGA         | 32 nt | 65.7 |
| Origami-S172 | CGGATAAGCTATTATTCTGAAACATTAAGAA           | 32 nt | 56.7 |
| Origami-S173 | TCCGGCACAACCTGTTGGGAAGGGCCTGGCGAA         | 32 nt | 70.8 |
| Origami-S174 | GCGGTTTGTGATTGCCCTTCACCGACGCTGGT          | 32 nt | 69.5 |
| Origami-S175 | TCCTAATTCGACAATAAACAAACATTTAGGCAG         | 32 nt | 59.3 |
| Origami-S176 | GCGAACTGTAAAACAGAGGTGAGGACGCTGAG          | 32 nt | 67.0 |
| Origami-S177 | AATGAAAAGTACAGACCAGGCGCAAGGACAGA          | 32 nt | 64.4 |
| Origami-S178 | AATCAATAGAAAATTCATATGGTTAATACATA          | 32 nt | 52.9 |
| Origami-S179 | ACACGACCAGCGTAAGAATACGTGTTTAATGC          | 32 nt | 63.1 |
| Origami-S180 | AGCACGTATAACGTGCTTTCCTCGTAATAAGT          | 32 nt | 61.8 |
| Origami-S181 | TAACGGAACAATTCGACAACCTCGTTATTAGAC         | 32 nt | 60.6 |
| Origami-S182 | AGTGAATTGGTTATATAACTATATAAGAACGC          | 32 nt | 56.7 |
| Origami-S183 | GTCCACTATGAAAGTATTAAGAGGAGCGGGGT          | 32 nt | 64.4 |
| Origami-S184 | TACGAGGCCTGTCTTTCCTTATCAACCAATCA          | 32 nt | 63.1 |
| Origami-S185 | ACAACCTTTCAGCCCTCATAGTTAGAGCCCAAT         | 32 nt | 63.1 |
| Origami-S186 | AGGAATACAAAACCAAATAGCGAGGGGTAAT           | 32 nt | 60.6 |
| Origami-S187 | GAGAAAACCTGAAATACCGACCGTGCGGAATCA         | 32 nt | 64.4 |
| Origami-S188 | CGACATTCCGCCTGCAACAGTGCCCGGTCAGT          | 32 nt | 70.8 |
| Origami-S189 | TGGATAGCTTACCAGACGACGATACACATTCA          | 32 nt | 63.1 |
| Origami-S190 | GGCAAAATCCCTTATGCAGGCGAAAATCCTGAGACGG     | 37 nt | 68.3 |
| Origami-S191 | TTCTTACCAGTATAAAGAAAAAGCCTGTTTCTAAATTT    | 38 nt | 58.4 |
| Origami-S192 | GCTGGTAATATCCAGACATTTTGGACGCTCAATCACCAGTC | 40 nt | 66.8 |
| Origami-S193 | AATTAACCTGAGCGCTAATATCAGAGTAAGCAGATAGCCGA | 40 nt | 64.7 |
| Origami-S194 | AGCCATTTGGGAATTACAGAATCAAGTTTGCCGGCATTTT  | 40 nt | 64.7 |
| Origami-S195 | AATCCGCGGCGCAGACGGTCAATCTGACAAGAACCGGATA  | 40 nt | 70.9 |
| Origami-S196 | TTGAGATGGTTTAATTACGAACTAACGGAACATGAGATTT  | 40 nt | 61.6 |

184

185

186

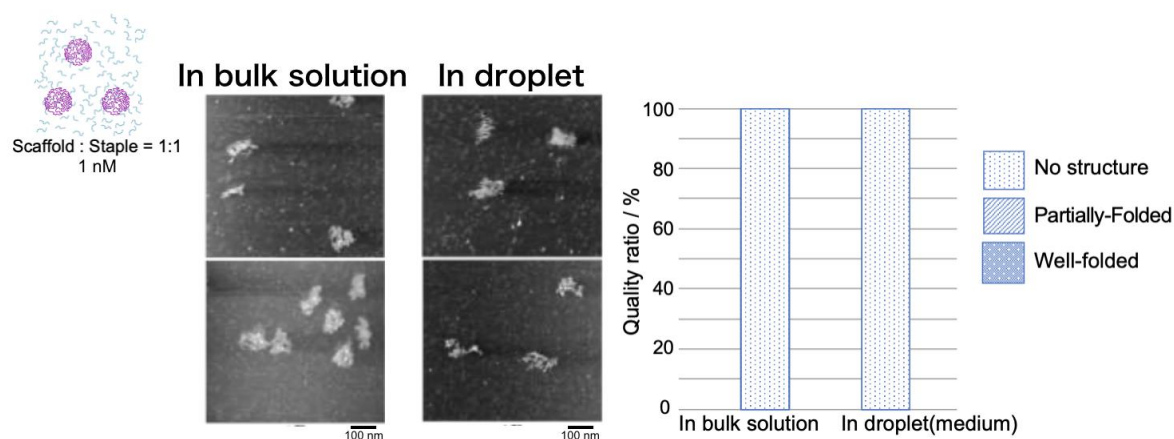

187

188 **Figure S19.** The “folding” efficiencies of DNA origami from a mixture of a 1:1 ratio of the scaffold  
189 to staple (1 nM). Only a non-structure state was observed in the sample in the case of DNA origami  
190 folding without starting from the purified DNA Origami sample. When the DNA solution is  
191 emulsified, the number of molecules present in the droplet varies according to the Poisson  
192 distribution. DNA origami is formed by combining approximately 200 types of staples to one  
193 scaffold. For this reason, in the droplet, it is thought that the yield of the folding was low due to the  
194 insufficient of the staple set constituting DNA origami. The yield in the bulk solution also low due  
195 to the low concentration of the DNA.  
196
